# Supplementary material for: Highly diastereoselective vinylogous Mukaiyama aldol reaction of α-keto phosphonates with 2-(trimethylsilyloxy)furan catalyzed by Cu(OTf)2
Source: Royal Society of Chemistry journal article supplement (doi:10.1039/c1ob05822c), 2011-01-01

**Highly Diastereoselective Vinylogous Mukaiyama Aldol Reaction  
of  $\alpha$ -Keto Phosphonates with 2-(Trimethylsilyloxy)furan  
Catalyzed by  $\text{Cu}(\text{OTf})_2$**

Jipan Yu, Xiaona Zhao, Zhiwei Miao\* and Ruyu Chen\*

*State Key Laboratory of Elemento-Organic Chemistry, Research Institute of Elemento-Organic Chemistry,  
Nankai University, Tianjin, China. E-mail: miaoziwei@nankai.edu.cn; Fax: +86 22 2350 2351; Tel: +86 22*

*2350 4783*

## Supporting Information

### Experimental Section

#### General Comments.

All reactions were carried out under an inert atmosphere and in heat-dried glassware. Anhydrous  $\text{CH}_2\text{Cl}_2$  were obtained by standard method. Flash column chromatography was performed on silica gel (particle size 10-40  $\mu\text{m}$ , Ocean Chemical Factory of Qingdao, China).  $^1\text{H}$  and  $^{13}\text{C}$  NMR spectra were recorded on Bruker-400 (400 MHz for  $^1\text{H}$ , 100 MHz for  $^{13}\text{C}$ , 121 MHz for  $^{31}\text{P}$ ). Chemical shifts were reported in ppm downfield from internal  $\text{Si}(\text{CH}_3)_4$ . The crystal structure was determined on a Bruker SMART 1000 CCD diffractometer. Mass spectra were recorded on a LCQ advantage spectrometer with ESI resource. HR-MS were recorded on APEXII and ZAB-HS spectrometer. Melting points were determined on a T-4 melting point apparatus (uncorrected).

**General procedure for the synthesis of dialkyl (2,5-dihydro-5-oxofuran-2-yl)(hydroxy) methylphosphonate 3:** A solution of  $\alpha$ -keto phosphonate **1** (1.0 mmol) in  $\text{CH}_2\text{Cl}_2$  (2 mL) was cooled to 0  $^\circ\text{C}$ , 2-(trimethylsilyloxy)furan **2** (0.32 g, 2.0 mmol) and  $\text{Cu}(\text{OTf})_2$  (0.018 g, 0.05 mmol) were added, subsequently added the TFE (0.12 g, 1.2 mmol). The mixture was stirred for corresponding time at 0  $^\circ\text{C}$ . The mixture was hydrolyzed with  $\text{H}_2\text{O}$  (5 mL). The aqueous phase was extracted with  $\text{CH}_2\text{Cl}_2$  ( $3 \times 10$  mL), and the organic layers were dried with anhydrous  $\text{MgSO}_4$ , filtered, and concentrated in vacuo to yield the crude products **3**, which were purified by flash column chromatography on silica gel [petroleum ether/ethyl acetate, 1:1 (V/V)] to provide pure products **3**.

#### Diethyl hydroxy(5-oxo-2,5-dihydrofuran-2-yl)(phenyl)methylphosphonate (3a):

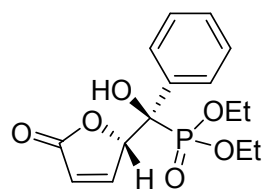

White solid; mp 104-106  $^\circ\text{C}$ ;  $^{31}\text{P}$ -NMR (121 MHz,  $\text{CDCl}_3$ ):  $\delta$  18.64, 18.80;  $^1\text{H}$ -NMR (400 MHz,  $\text{CDCl}_3$ ):  $\delta$  1.25 (td,  $^3J_{\text{H-H}} = 7.0$  Hz,  $^3J_{\text{P-H}} = 5.0$  Hz, 6H,  $(\text{POCH}_2\text{CH}_3)_2$ ), 3.93-4.15 (m, 4H,  $\text{P}(\text{OCH}_2\text{CH}_3)_2$ ), 5.60 (d,  $^3J_{\text{H-H}} = 5.6$  Hz, 1H,  $\text{HC}=\text{CHCH}$ ), 6.07 (d,  $^3J_{\text{H-H}} = 5.7$  Hz, 1H,  $\text{HC}=\text{CHCH}$ ), 7.31 (t,  $^3J_{\text{H-H}} = 7.2$  Hz, 1H, Ph), 7.36 (t,  $^3J_{\text{H-H}} = 7.4$  Hz, 2H, Ph), 7.62 (d,  $^3J_{\text{H-H}} = 7.6$  Hz, 2H, Ph), 7.66 (t,  $^3J_{\text{H-H}} = 5.7$  Hz, 1H,  $\text{HC}=\text{CHCH}$ );  $^{13}\text{C}$ -NMR (100 MHz,  $\text{CDCl}_3$ ):  $\delta$  16.32 (t,  $^3J_{\text{C,P}} = 5.0$  Hz,  $\text{P}(\text{OCH}_2\text{CH}_3)_2$ ), 64.23 (d,  $^2J_{\text{C,P}} = 7.8$  Hz,  $\text{P}(\text{OCH}_2\text{CH}_3)_2$ ), 64.44 (d,

$^2J_{C,P} = 7.5$  Hz,  $P(OCH_2CH_3)_2$ , 76.45 (d,  $^1J_{C,P} = 162.5$  Hz,  $CP(OCH_2CH_3)_2$ ), 85.00 (d,  $^2J_{C,P} = 10.0$  Hz,  $HC=CHCH$ ), 123.00, 126.12 (d,  $^3J_{C,P} = 4.2$  Hz), 128.19 (d,  $^4J_{C,P} = 1.7$  Hz), 128.23 (d,  $^2J_{C,P} = 9.2$  Hz), 135.58, 153.65 (d,  $^3J_{C,P} = 4.7$  Hz), 172.60; ESI-MS: 349.0 ( $[M+Na]^+$ ); HRMS calcd for  $C_{15}H_{19}O_6P$ : 349.0811 ( $M+Na$ ) $^+$ , found: 349.0819.

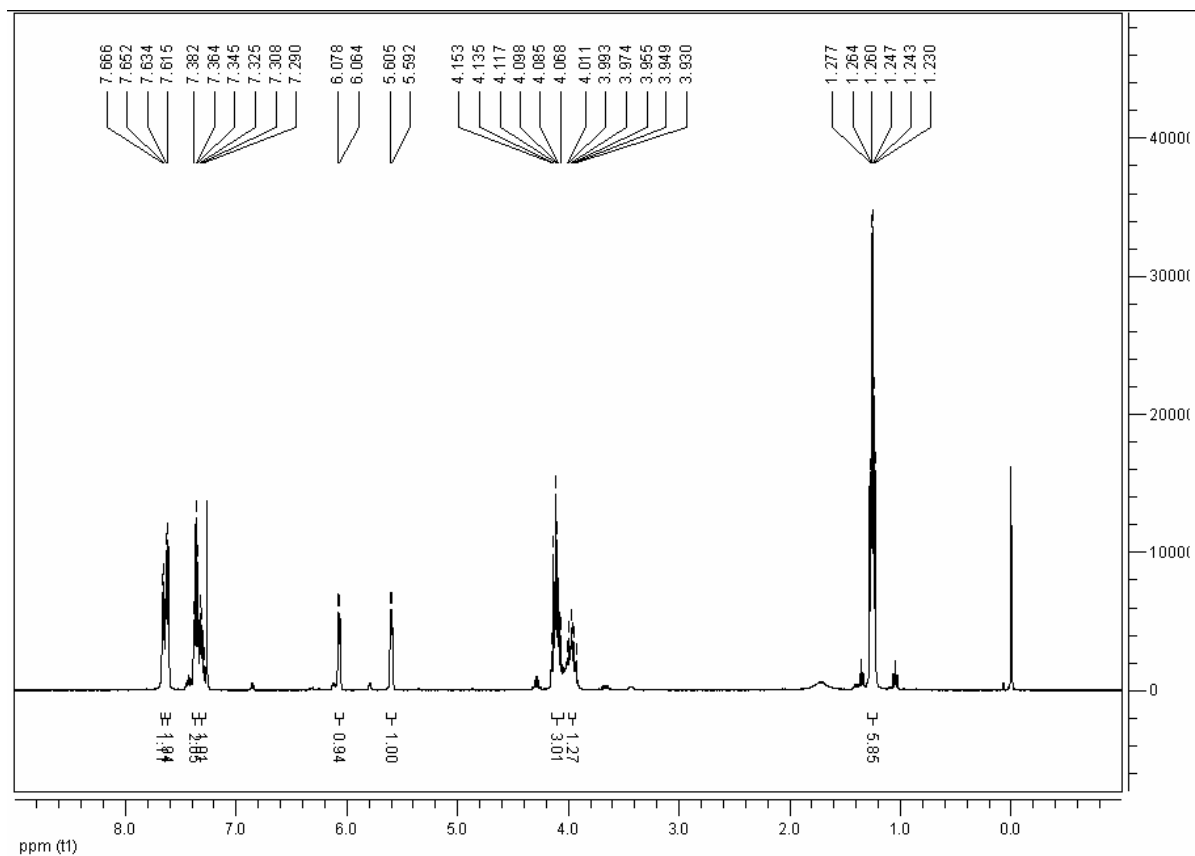

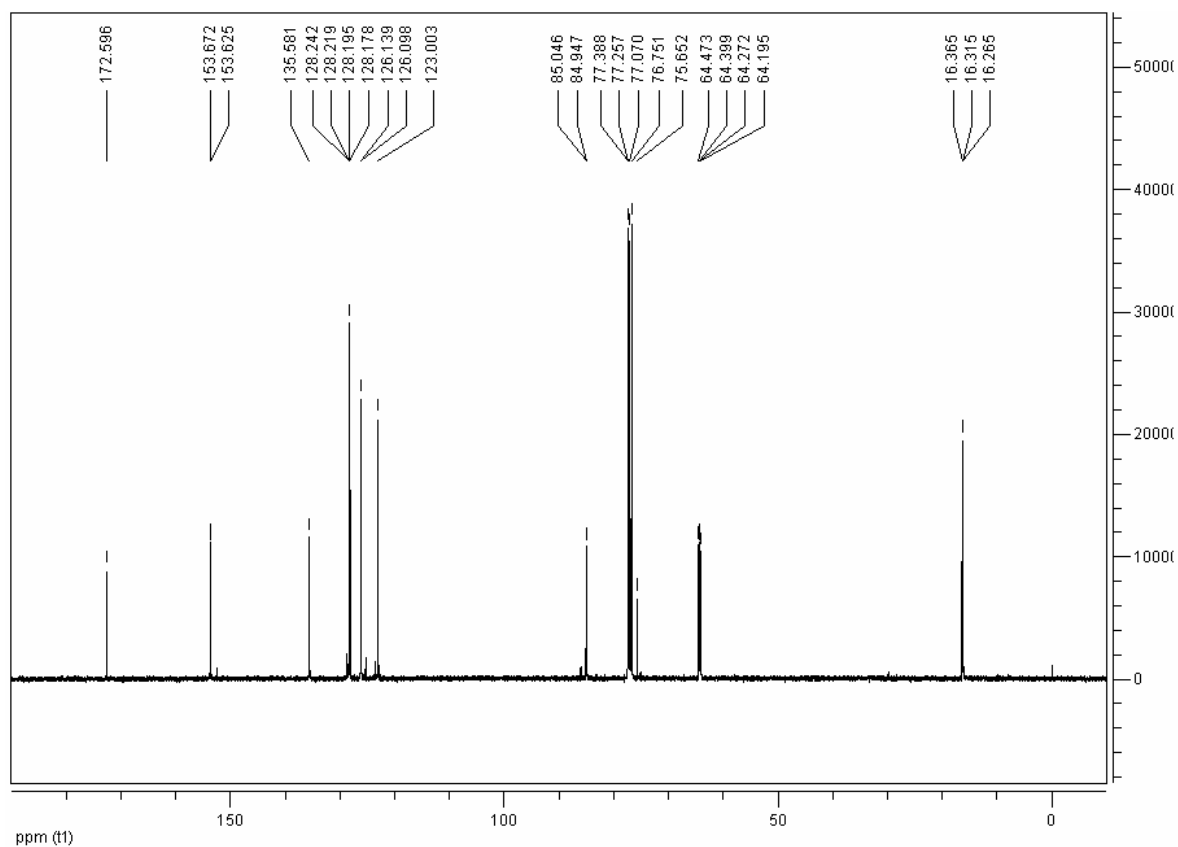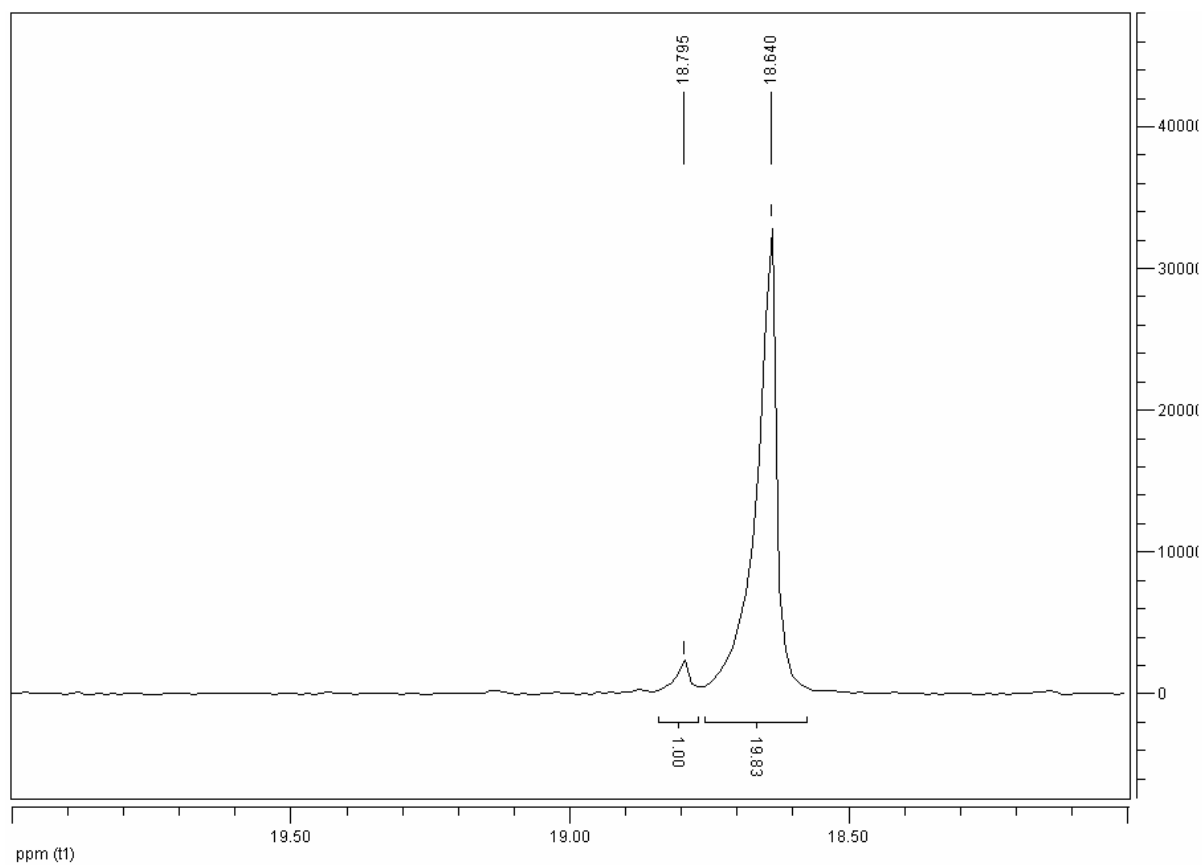

**Dimethyl hydroxy(5-oxo-2,5-dihydrofuran-2-yl)(phenyl)methylphosphonate (3b):**

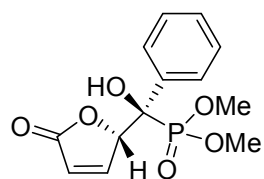

White solid; mp 131-134 °C;  $^{31}\text{P}$ -NMR (121 MHz,  $\text{CDCl}_3$ ):  $\delta$  20.15, 20.81;  $^1\text{H}$ -NMR (400 MHz,  $\text{CDCl}_3$ ):  $\delta$  3.67 (d,  $^3J_{\text{P-H}} = 10.5$  Hz, 3H,  $\text{P}(\text{OCH}_3)_2$ ), 3.77 (d,  $^3J_{\text{P-H}} = 10.5$  Hz, 3H,  $\text{P}(\text{OCH}_3)_2$ ), 5.61 (d,  $^3J_{\text{H-H}} = 6.0$  Hz, 1H,  $\text{HC}=\text{CHCH}$ ), 6.11 (dd,  $^3J_{\text{H-H}} = 6.0$  Hz,  $^4J_{\text{H-H}} = 1.6$  Hz, 1H,  $\text{HC}=\text{CHCH}$ ), 7.32-7.41 (m, 3H, Ph), 7.62-7.69 (m, 3H, Ph,  $\text{HC}=\text{CHCH}$ );  $^{13}\text{C}$ -NMR (100 MHz,  $\text{CDCl}_3$ ):  $\delta$  54.56 (d,  $^2J_{\text{C,P}} = 7.8$  Hz,  $\text{P}(\text{OCH}_3)_2$ ), 54.83 (d,  $^2J_{\text{C,P}} = 7.3$  Hz,  $\text{P}(\text{OCH}_3)_2$ ), 76.72 (d,  $^1J_{\text{C,P}} = 162.2$  Hz,  $\text{CP}(\text{OCH}_3)_2$ ), 84.79 (d,  $^2J_{\text{C,P}} = 9.6$  Hz,  $\text{HC}=\text{CHCH}$ ), 123.10, 126.02 (d,  $^3J_{\text{C,P}} = 4.4$  Hz), 128.35 (d,  $^2J_{\text{C,P}} = 8.4$  Hz), 128.45 (d,  $^4J_{\text{C,P}} = 2.2$  Hz), 135.20, 153.50 (d,  $^3J_{\text{C,P}} = 4.9$  Hz), 172.48; ESI-MS: 321.0 ( $[\text{M}+\text{Na}]^+$ ); HRMS calcd for  $\text{C}_{13}\text{H}_{15}\text{O}_6\text{P}$ : 321.0498 ( $\text{M}+\text{Na}$ ) $^+$ , found: 321.0507.

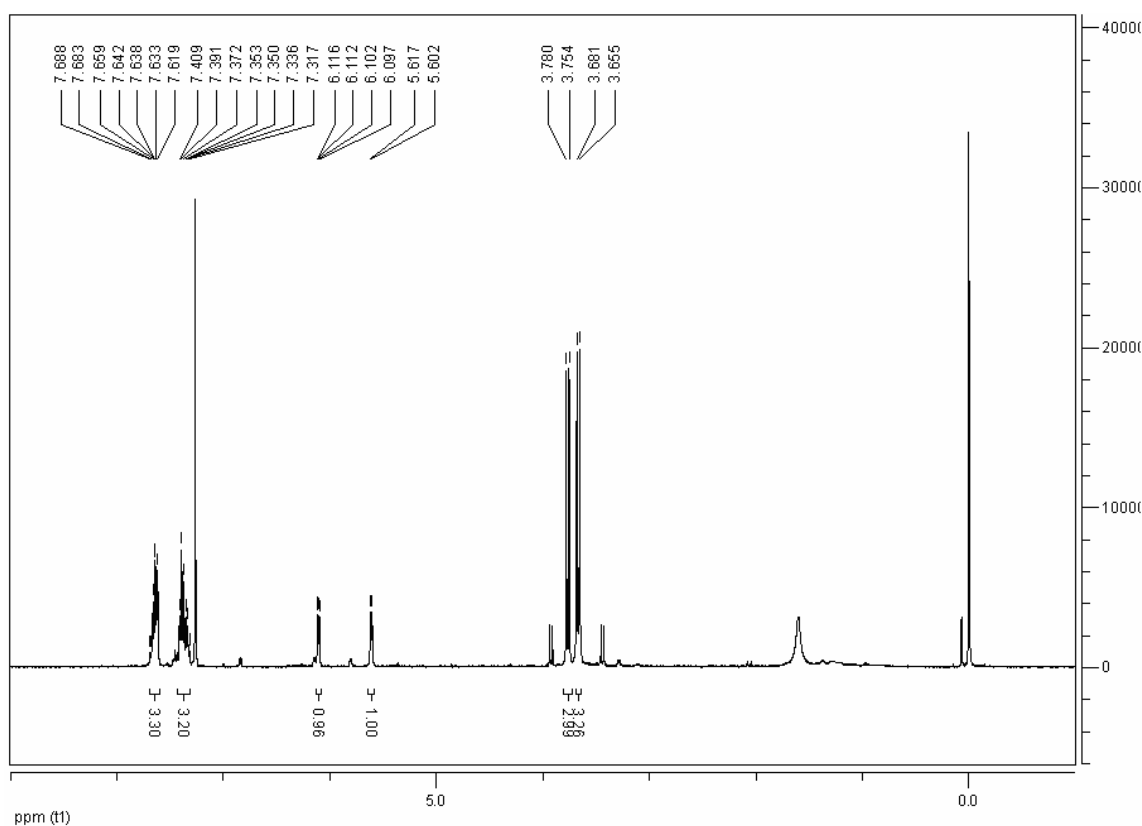

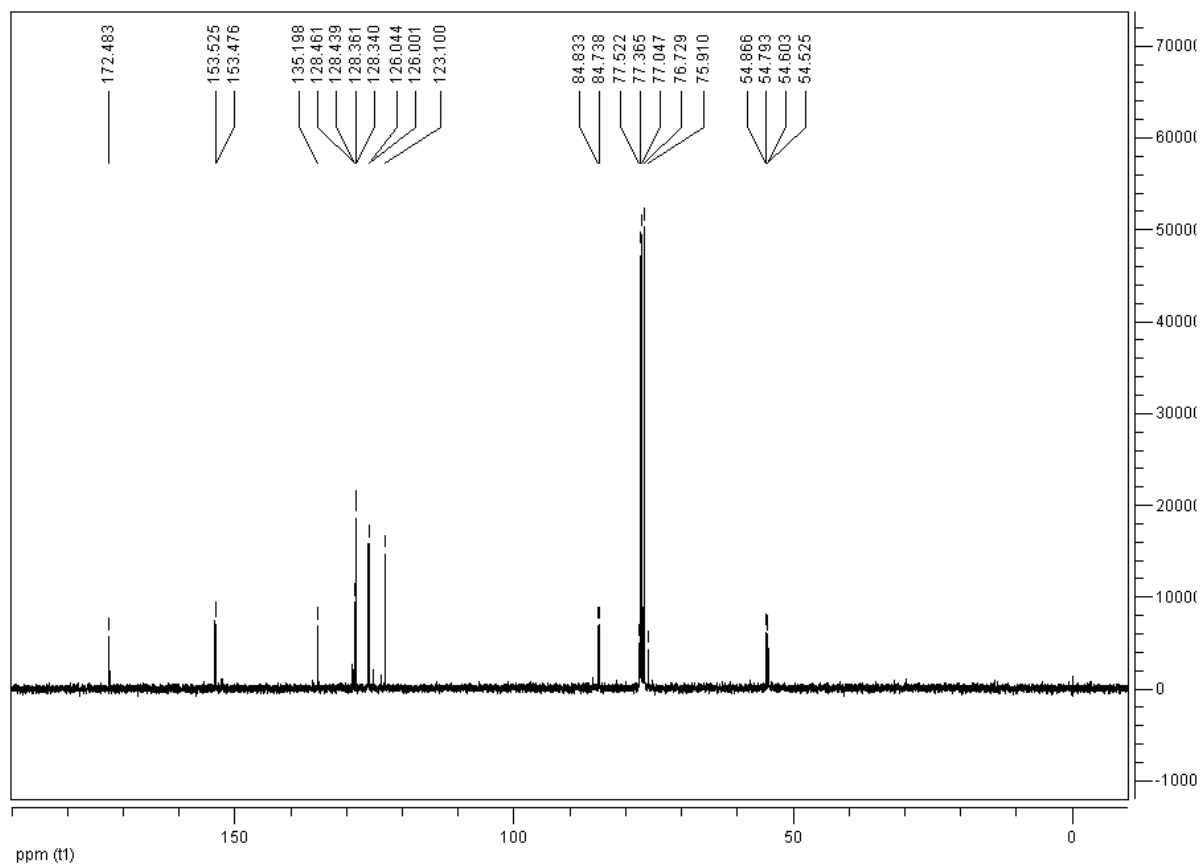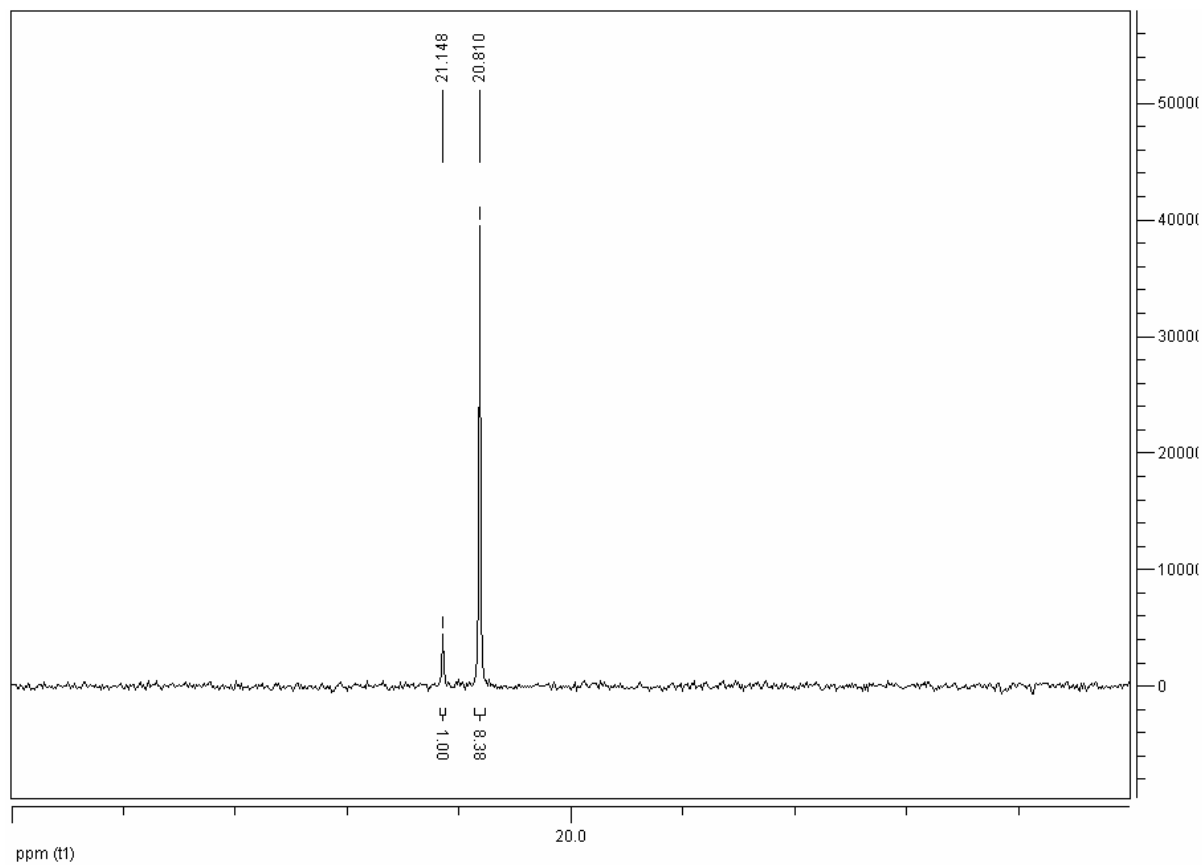

### Dimethyl hydroxy(5-oxo-2,5-dihydrofuran-2-yl)(*p*-chlorophenyl)methylphosphonate

(3c):

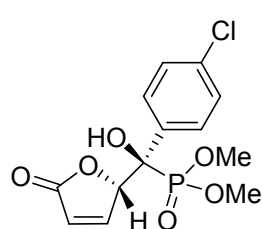

White solid; mp 123-126 °C;  $^{31}\text{P}$ -NMR (121 MHz,  $\text{CDCl}_3$ ):  $\delta$  20.76;  $^1\text{H}$ -NMR (400 MHz,  $\text{CDCl}_3$ ):  $\delta$  3.52 (d,  $^3J_{\text{P-H}} = 10.6$  Hz, 3H,  $\text{P}(\text{OCH}_3)_2$ ), 3.94 (d,  $^3J_{\text{P-H}} = 10.6$  Hz, 3H,  $\text{P}(\text{OCH}_3)_2$ ), 5.74 (t,  $^3J_{\text{H-H}} = 2.0$  Hz, 1H,  $\text{HC}=\text{CHCH}$ ), 6.18 (d,  $^3J_{\text{H-H}} = 5.8$  Hz, 1H,  $\text{HC}=\text{CHCH}$ ), 6.85 (d,  $^3J_{\text{H-H}} = 5.8$  Hz, 1H,  $\text{HC}=\text{CHCH}$ ), 7.43 (d,  $^3J_{\text{H-H}} = 8.5$  Hz, 2H, Ph), 7.63 (dd,  $^3J_{\text{H-H}} = 8.7$  Hz,  $^4J_{\text{P-H}} = 2.0$  Hz, 2H, Ph);  $^{13}\text{C}$ -NMR (100 MHz,  $\text{CDCl}_3$ ):  $\delta$  54.46 (d,  $^2J_{\text{C,P}} = 7.5$  Hz,  $\text{P}(\text{OCH}_3)_2$ ), 54.69 (d,  $^2J_{\text{C,P}} = 6.6$  Hz,  $\text{P}(\text{OCH}_3)_2$ ), 75.68 (d,  $^1J_{\text{C,P}} = 159.8$  Hz,  $\text{CP}(\text{OCH}_3)_2$ ), 85.56 (d,  $^2J_{\text{C,P}} = 3.9$  Hz,  $\text{HC}=\text{CHCH}$ ), 123.96, 126.77 (d,  $^3J_{\text{C,P}} = 4.3$  Hz), 129.14, 133.55, 134.82 (d,  $^4J_{\text{C,P}} = 3.1$  Hz), 151.86 (d,  $^2J_{\text{C,P}} = 9.9$  Hz), 172.15; ESI-MS: 354.9 ( $[\text{M}+\text{Na}]^+$ ); HRMS calcd for  $\text{C}_{13}\text{H}_{14}\text{ClO}_6\text{P}$ : 355.0109 ( $\text{M}+\text{Na}$ ) $^+$ , found: 355.0116.

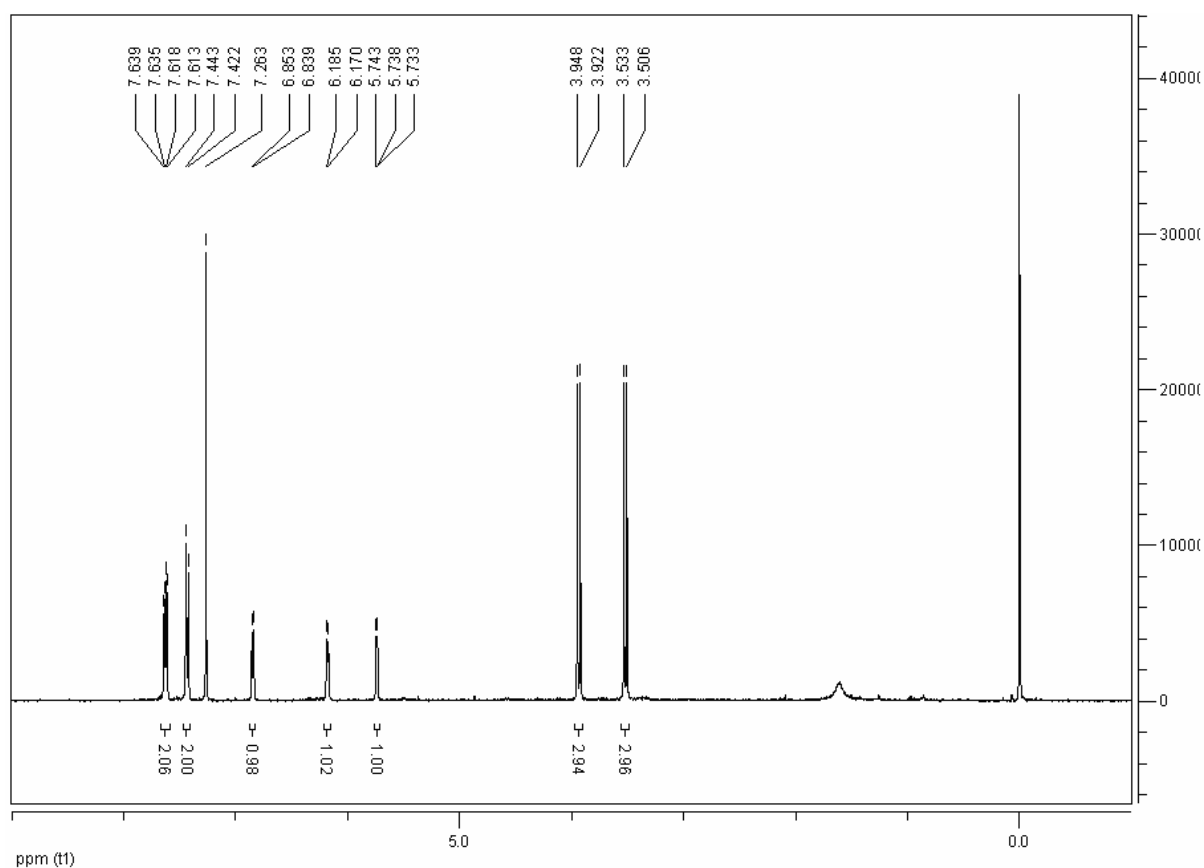

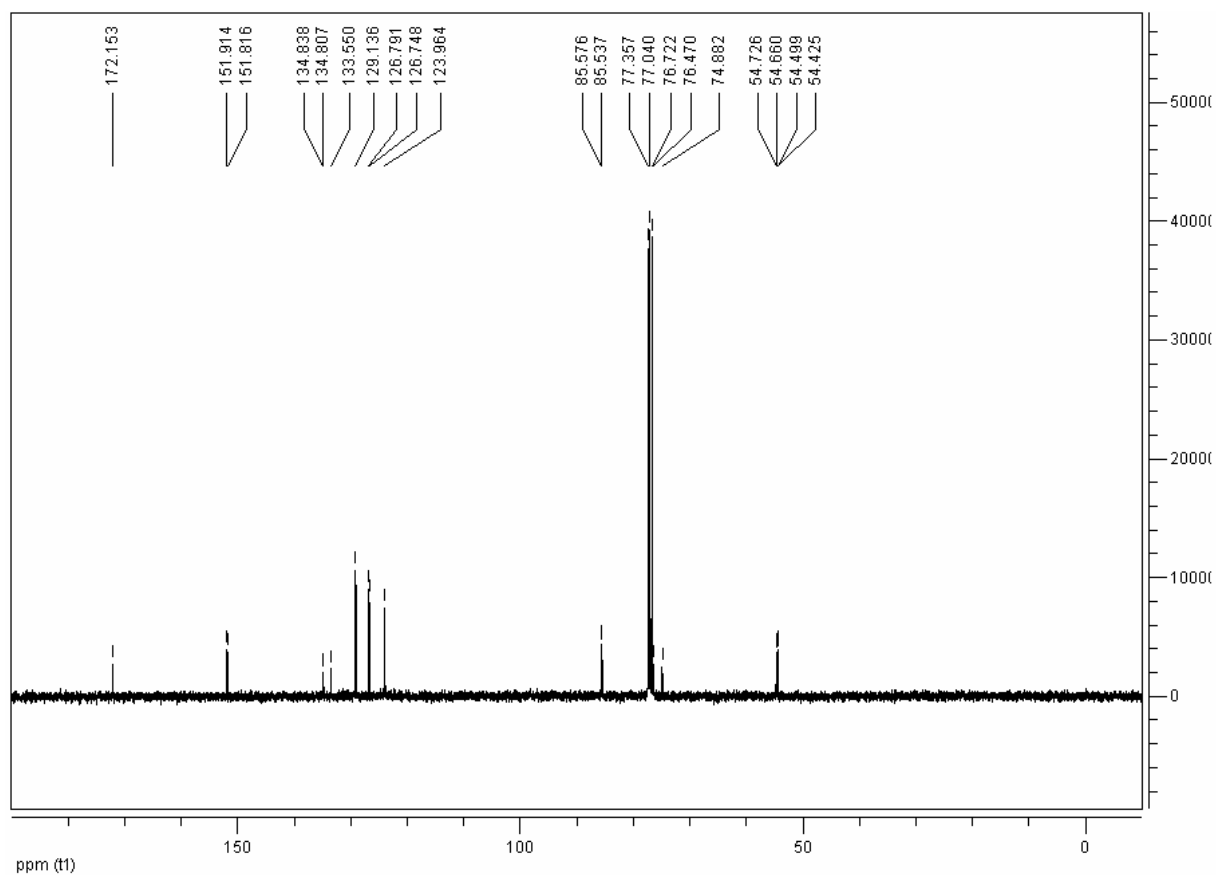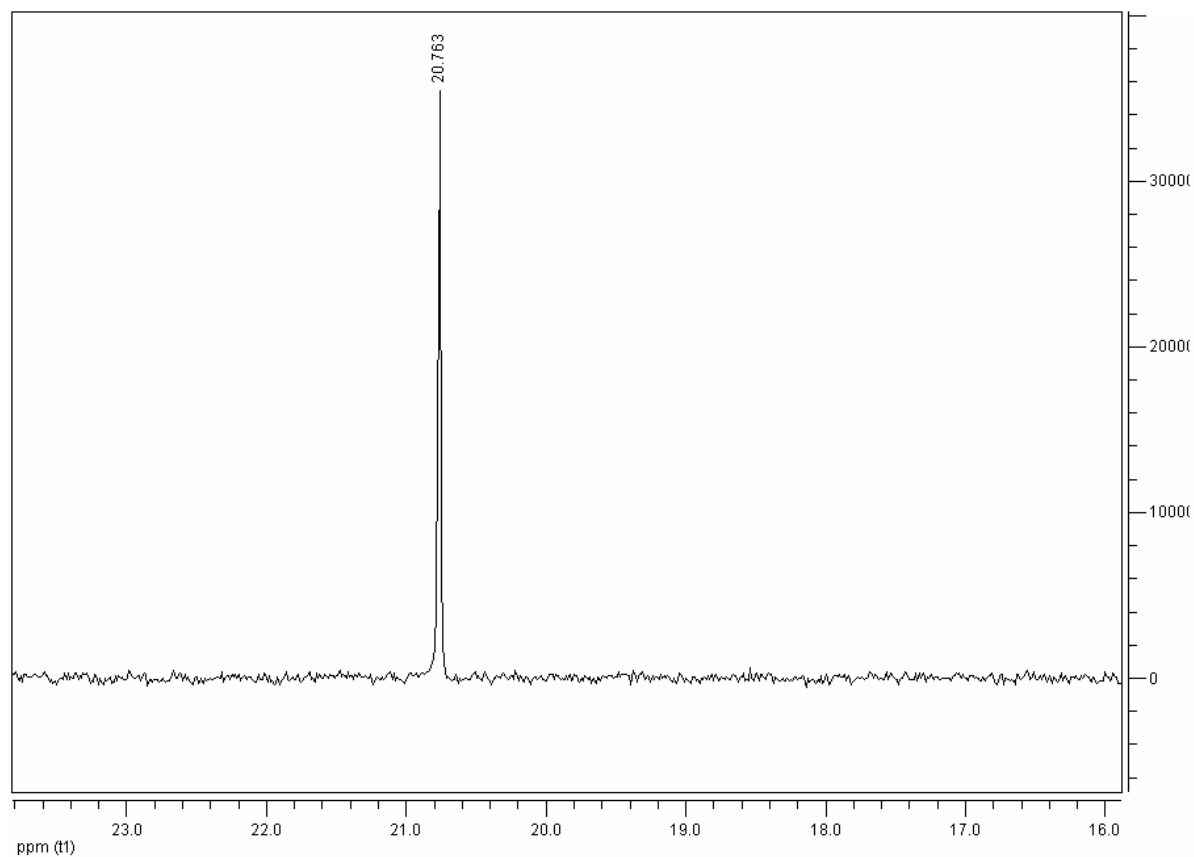



**Diethyl hydroxy(5-oxo-2,5-dihydrofuran-2-yl)(*p*-chlorophenyl)methylphosphonate (3d):**

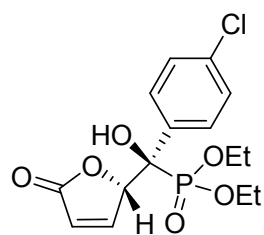

White solid; mp 77-80 °C;  $^{31}\text{P}$ -NMR (121 MHz,  $\text{CDCl}_3$ ):  $\delta$  18.54;  $^1\text{H}$ -NMR (400 MHz,  $\text{CDCl}_3$ ):  $\delta$  1.28 (q,  $^3J_{\text{H-H}} = 7.5$  Hz, 6H,  $\text{P}(\text{OCH}_2\text{CH}_3)_2$ ), 3.98-4.19 (m, 4H,  $\text{P}(\text{OCH}_2\text{CH}_3)_2$ ), 5.56 (d,  $^3J_{\text{H-H}} = 5.5$  Hz, 1H,  $\text{HC}=\text{CHCH}$ ), 6.11 (dd,  $^3J_{\text{H-H}} = 5.8$  Hz,  $^4J_{\text{H-H}} = 1.0$  Hz, 1H,  $\text{HC}=\text{CHCH}$ ), 7.34 (d,  $^3J_{\text{H-H}} = 8.5$  Hz, 2H, Ph), 7.57 (dd,  $^3J_{\text{H-H}} = 8.7$  Hz,  $^4J_{\text{P-H}} = 1.8$  Hz, 2H, Ph), 7.64 (d,  $^3J_{\text{H-H}} = 5.8$  Hz, 1H,  $\text{HC}=\text{CHCH}$ );  $^{13}\text{C}$ -NMR (100 MHz,  $\text{CDCl}_3$ ):  $\delta$  16.31 (d,  $^3J_{\text{C,P}} = 5.6$  Hz,  $\text{P}(\text{OCH}_2\text{CH}_3)_2$ ), 16.39 (d,  $^3J_{\text{C,P}} = 5.6$  Hz,  $\text{P}(\text{OCH}_2\text{CH}_3)_2$ ), 64.41 (d,  $^2J_{\text{C,P}} = 7.6$  Hz,  $\text{P}(\text{OCH}_2\text{CH}_3)_2$ ), 64.58 (d,  $^2J_{\text{C,P}} = 7.6$  Hz,  $\text{P}(\text{OCH}_2\text{CH}_3)_2$ ), 76.80 (d,  $^1J_{\text{C,P}} = 161.7$  Hz,  $\text{CP}(\text{OCH}_2\text{CH}_3)_2$ ), 84.60 (d,  $^2J_{\text{C,P}} = 9.2$  Hz,  $\text{HC}=\text{CHCH}$ ), 123.29, 127.63 (d,  $^3J_{\text{C,P}} = 3.9$  Hz), 128.38 (d,  $^4J_{\text{C,P}} = 1.1$  Hz), 134.04, 134.36 (d,  $^3J_{\text{C,P}} = 2.5$  Hz), 153.28 (d,  $^2J_{\text{C,P}} = 5.0$  Hz), 172.32; ESI-MS: 383.0 ( $[\text{M}+\text{Na}]^+$ ); HRMS calcd for  $\text{C}_{15}\text{H}_{18}\text{ClO}_6\text{P}$ : 383.0422 ( $\text{M}+\text{Na})^+$ , found: 383.0415.

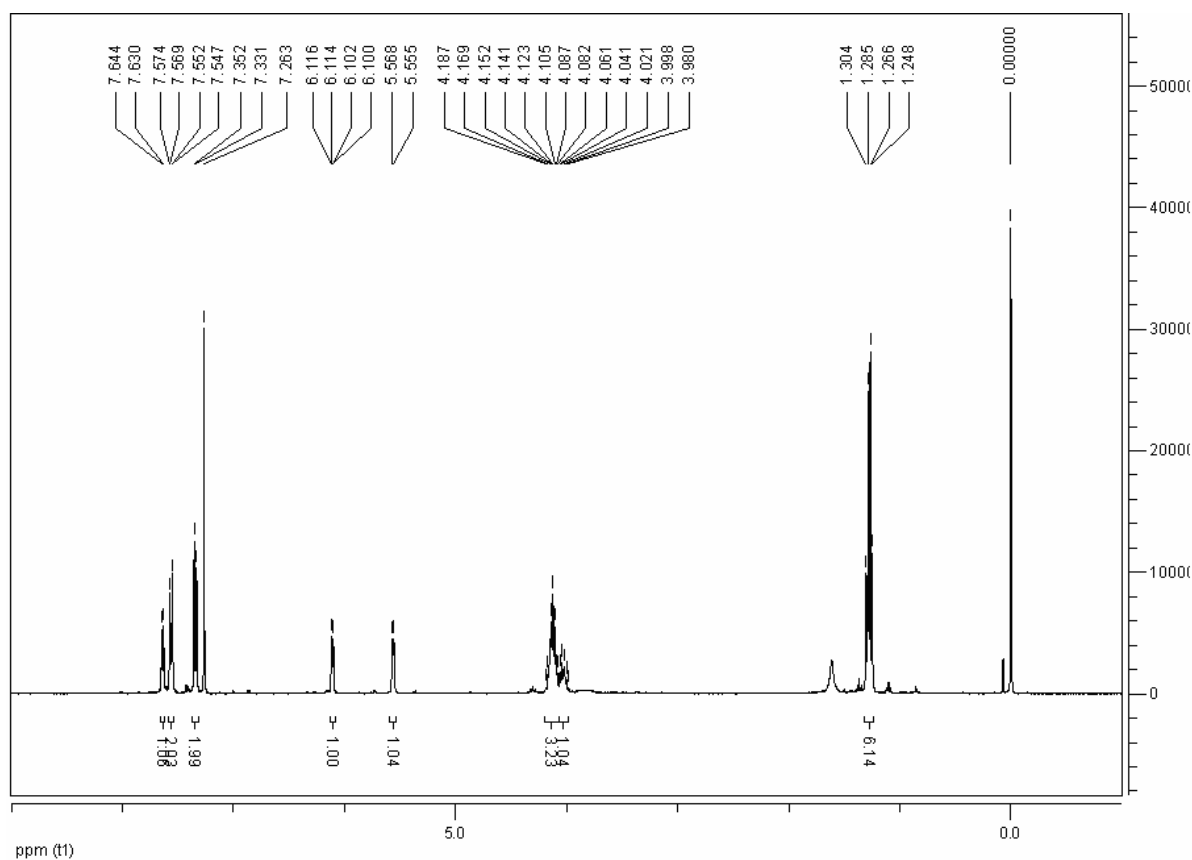

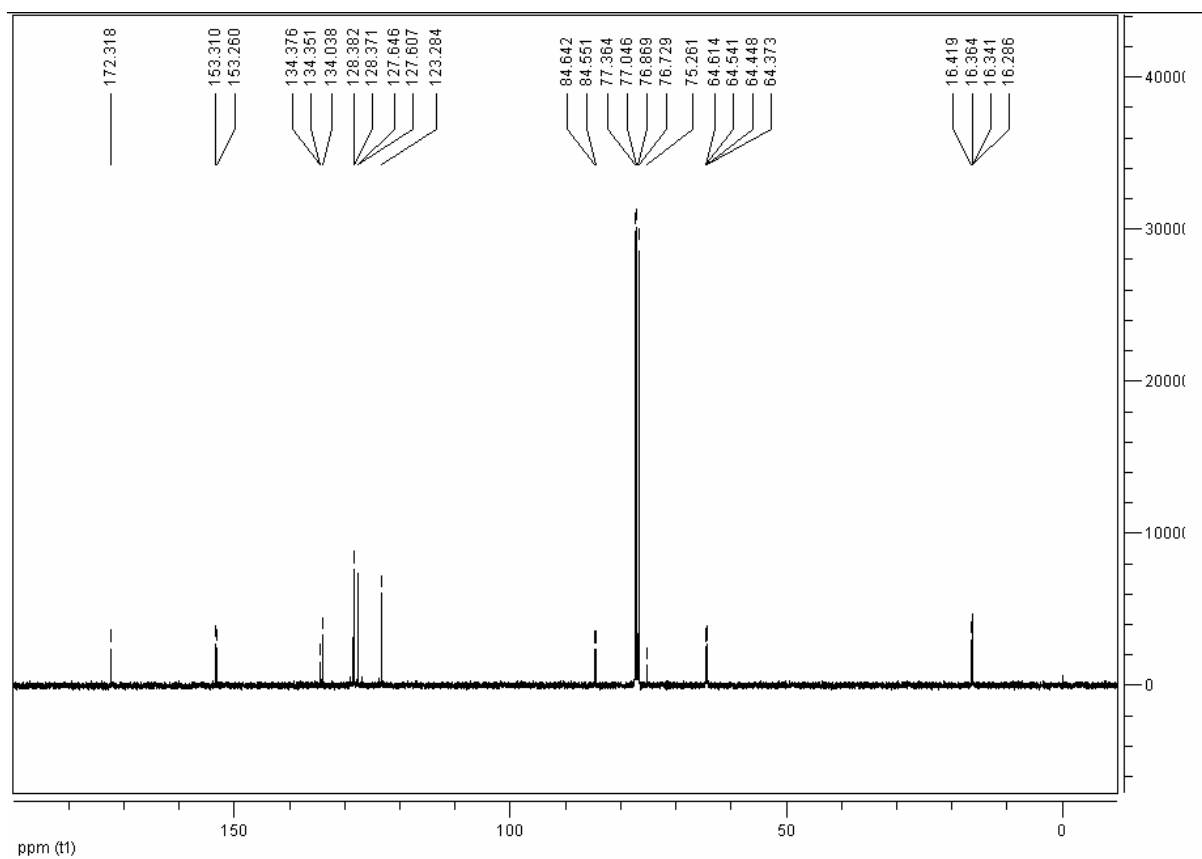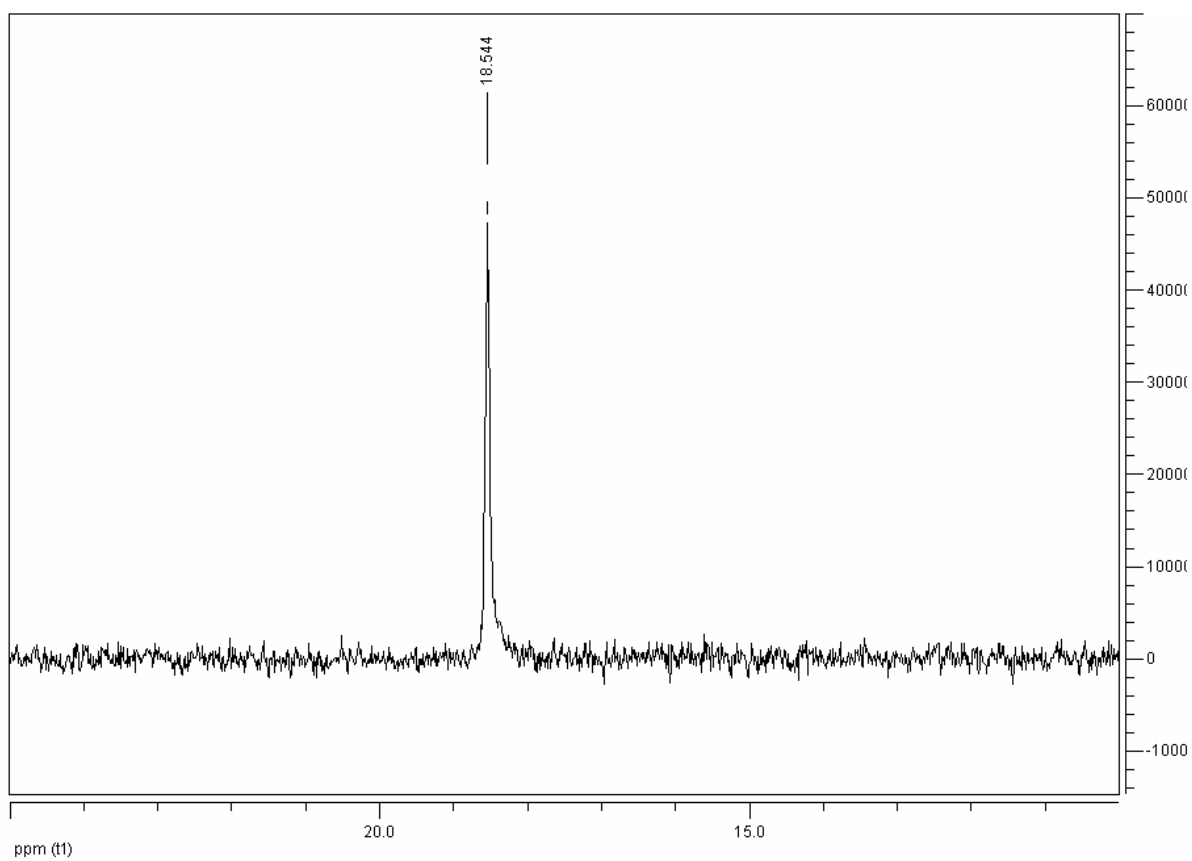

**Dimethyl hydroxy(5-oxo-2,5-dihydrofuran-2-yl)(*o*-tolyl)methylphosphonate (3e):**

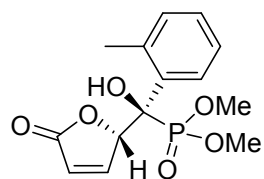

White solid; mp 89-91 °C;  $^{31}\text{P}$ -NMR (121 MHz,  $\text{CDCl}_3$ ):  $\delta$  20.75, 22.24;  $^1\text{H}$ -NMR (400 MHz,  $\text{CDCl}_3$ ):  $\delta$  2.63 (s, 3H,  $\text{CH}_3$ ), 3.55 (d,  $^3J_{\text{P-H}} = 10.5$  Hz, 3H,  $\text{P}(\text{OCH}_3)_2$ ), 3.78 (d,  $^3J_{\text{P-H}} = 10.5$  Hz, 3H,  $\text{P}(\text{OCH}_3)_2$ ), 5.93 (s, 1H,  $\text{HC}=\text{CHCH}$ ), 6.18 (d,  $^3J_{\text{H-H}} = 5.6$  Hz, 1H,  $\text{HC}=\text{CHCH}$ ), 7.18-7.26 (m, 3H, *Ph*), 7.66 (d,  $^3J_{\text{H-H}} = 5.9$  Hz, 1H, *Ph*), 7.70 (d,  $^3J_{\text{H-H}} = 5.6$  Hz, 1H,  $\text{HC}=\text{CHCH}$ );  $^{13}\text{C}$ -NMR (100 MHz,  $\text{CDCl}_3$ ):  $\delta$  23.11, 54.38 (d,  $^2J_{\text{C,P}} = 7.7$  Hz,  $\text{P}(\text{OCH}_3)_2$ ), 54.63 (d,  $^2J_{\text{C,P}} = 7.7$  Hz,  $\text{P}(\text{OCH}_3)_2$ ), 79.53 (d,  $^1J_{\text{C,P}} = 161.1$  Hz,  $\text{HCP}(\text{OCH}_3)_2$ ), 85.50 (d,  $^2J_{\text{C,P}} = 14.4$  Hz,  $\text{HC}=\text{CHCH}$ ), 122.68, 125.70, 128.10 (d,  $^3J_{\text{C,P}} = 3.5$  Hz), 128.44, 128.82, 130.94, 133.30, 154.16, 173.15; ESI-MS: 312.7 ( $[\text{M}+\text{H}]^+$ ); HRMS calcd for  $\text{C}_{14}\text{H}_{17}\text{O}_6\text{P}$ : 335.0655 ( $\text{M}+\text{Na}$ ) $^+$ , found: 335.0660.

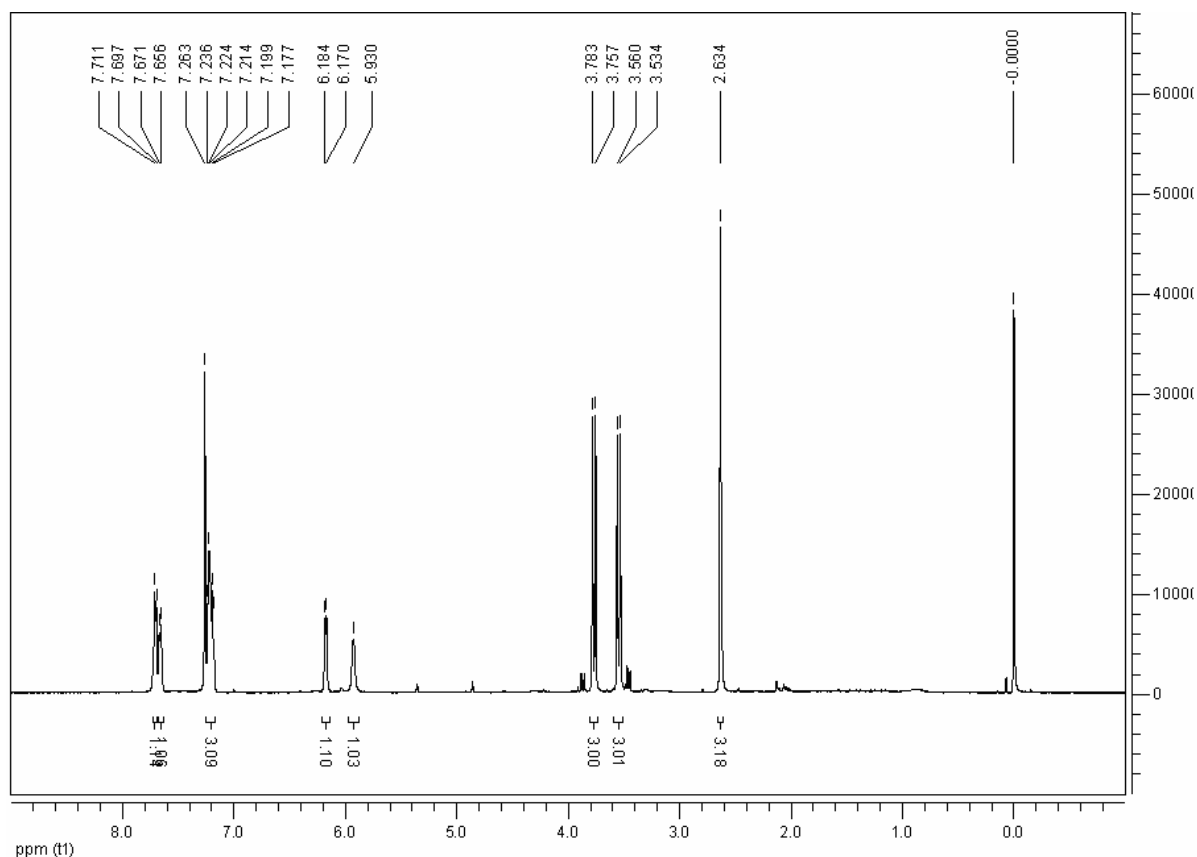

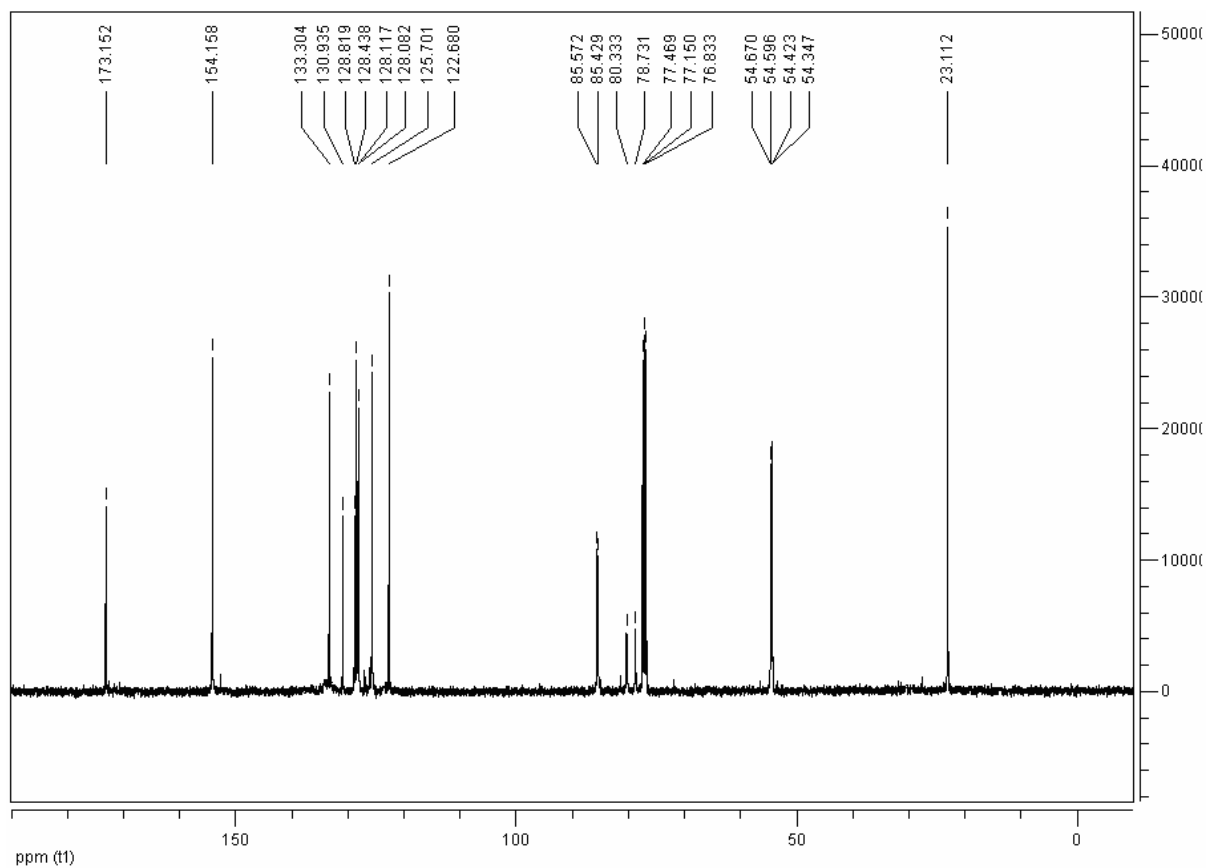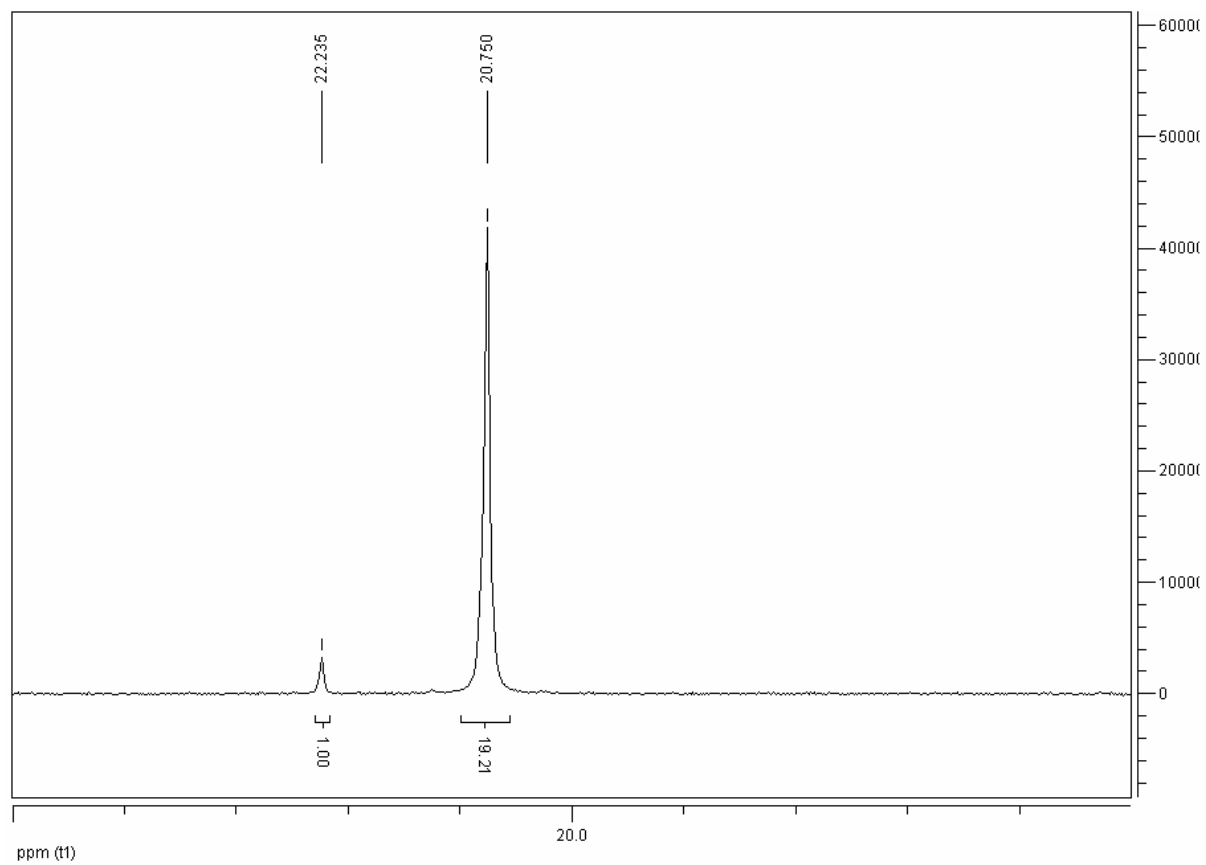

**Diethyl hydroxy(5-oxo-2,5-dihydrofuran-2-yl)(*m*-tolyl)methylphosphonate (3f):**

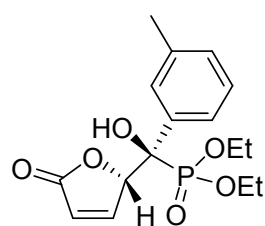

White solid; mp 48-51 °C;  $^{31}\text{P}$ -NMR (121 MHz,  $\text{CDCl}_3$ ):  $\delta$  18.67;  $^1\text{H}$ -NMR (400 MHz,  $\text{CDCl}_3$ ):  $\delta$  1.22 (t,  $^3J_{\text{H-H}} = 7.1$  Hz, 3H,  $\text{P}(\text{OCH}_2\text{CH}_3)_2$ ), 1.28 (t,  $^3J_{\text{H-H}} = 7.1$  Hz, 3H,  $\text{P}(\text{OCH}_2\text{CH}_3)_2$ ), 2.37 (s, 3H,  $\text{CH}_3$ ), 3.84-4.16 (m, 4H,  $\text{P}(\text{OCH}_2\text{CH}_3)_2$ ), 5.62 (d,  $^3J_{\text{H-H}} = 5.6$  Hz, 1H,  $\text{HC}=\text{CHCH}$ ), 6.12 (dd,  $^3J_{\text{H-H}} = 5.6$  Hz,  $^3J_{\text{H-H}} = 1.8$  Hz, 1H,  $\text{HC}=\text{CHCH}$ ), 7.13 (d,  $^3J_{\text{H-H}} = 7.4$  Hz, 1H, Ph), 7.26 (d,  $^3J_{\text{H-H}} = 15.2$  Hz, 1H, Ph), 7.42 (d,  $^3J_{\text{H-H}} = 11.1$  Hz, 2H, Ph), 7.69 (d,  $^3J_{\text{H-H}} = 5.6$  Hz, 1H,  $\text{HC}=\text{CHCH}$ );  $^{13}\text{C}$ -NMR (100 MHz,  $\text{CDCl}_3$ ):  $\delta$  16.30 (d,  $^3J_{\text{C,P}} = 5.5$  Hz,  $\text{P}(\text{OCH}_2\text{CH}_3)_2$ ), 21.63, 64.25 (d,  $^2J_{\text{C,P}} = 7.7$  Hz,  $\text{P}(\text{OCH}_2\text{CH}_3)_2$ ), 64.46 (d,  $^2J_{\text{C,P}} = 7.3$  Hz,  $\text{P}(\text{OCH}_2\text{CH}_3)_2$ ), 76.46 (d,  $^1J_{\text{C,P}} = 161.5$  Hz,  $\text{CP}(\text{OCH}_2\text{CH}_3)_2$ ), 85.12 (d,  $^2J_{\text{C,P}} = 10.6$  Hz,  $\text{HC}=\text{CHCH}$ ), 122.96, 123.17 (d,  $^3J_{\text{C,P}} = 3.9$  Hz), 126.66 (d,  $^3J_{\text{C,P}} = 4.4$  Hz), 128.08 (d,  $^4J_{\text{C,P}} = 1.2$  Hz), 129.02 (d,  $^4J_{\text{C,P}} = 1.6$  Hz), 135.48, 137.85, 153.66 (d,  $^3J_{\text{C,P}} = 4.1$  Hz), 172.63; ESI-MS: 340.7 ( $[\text{M}+\text{H}]^+$ ); HRMS calcd for  $\text{C}_{16}\text{H}_{21}\text{O}_6\text{P}$ : 363.0968 ( $\text{M}+\text{Na}$ ) $^+$ , found: 363.0962.

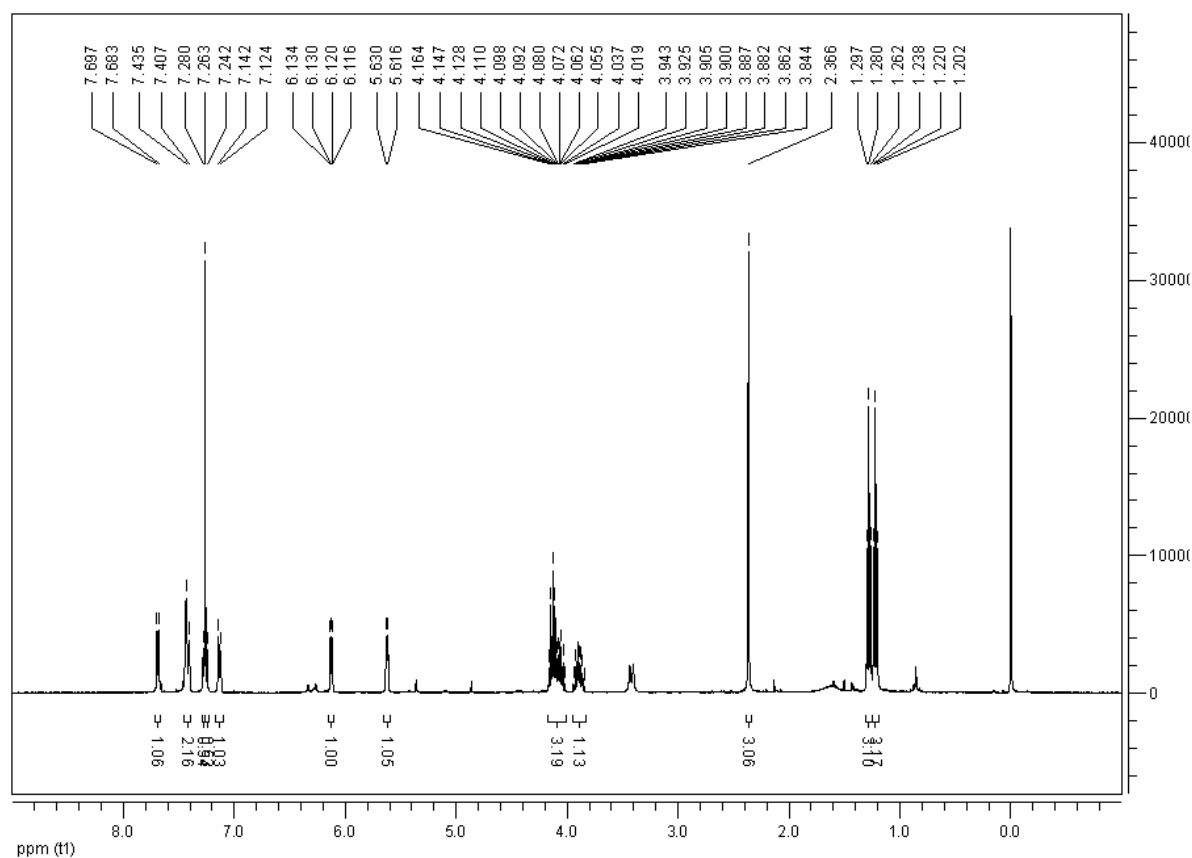

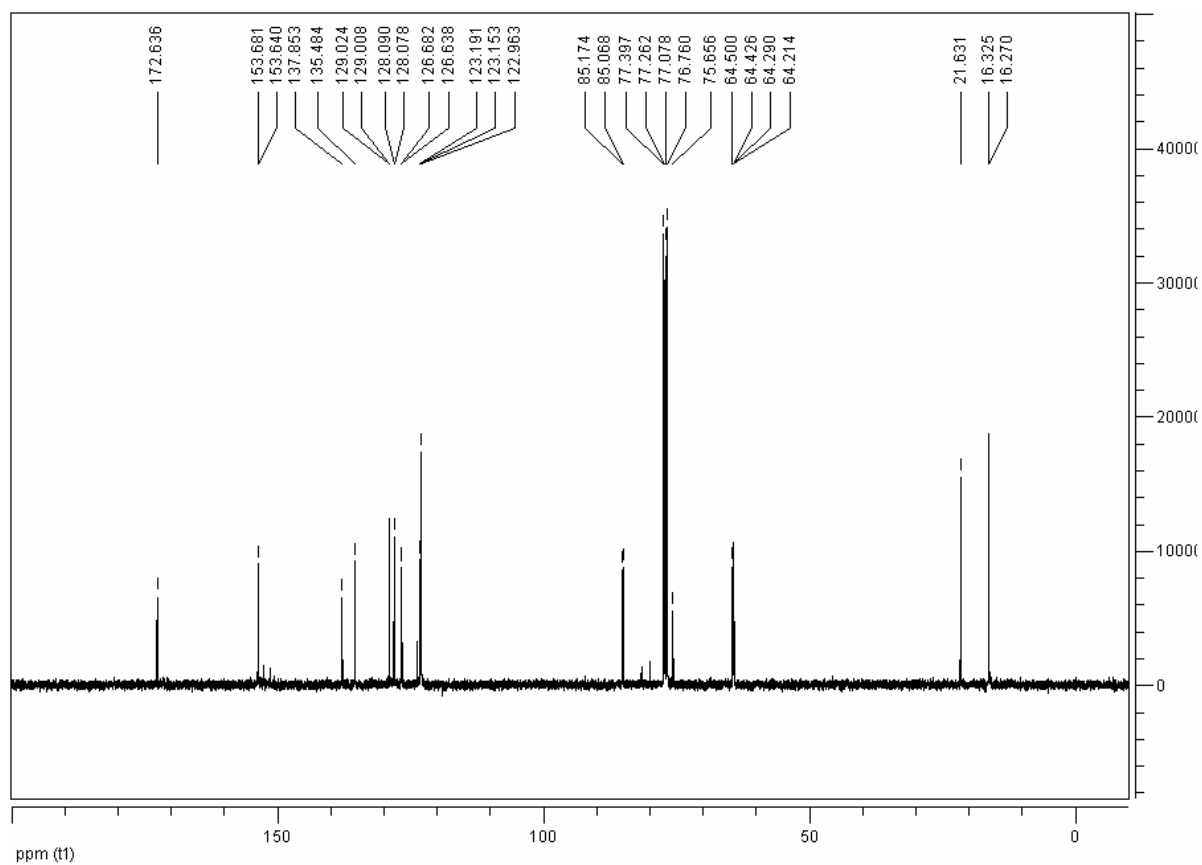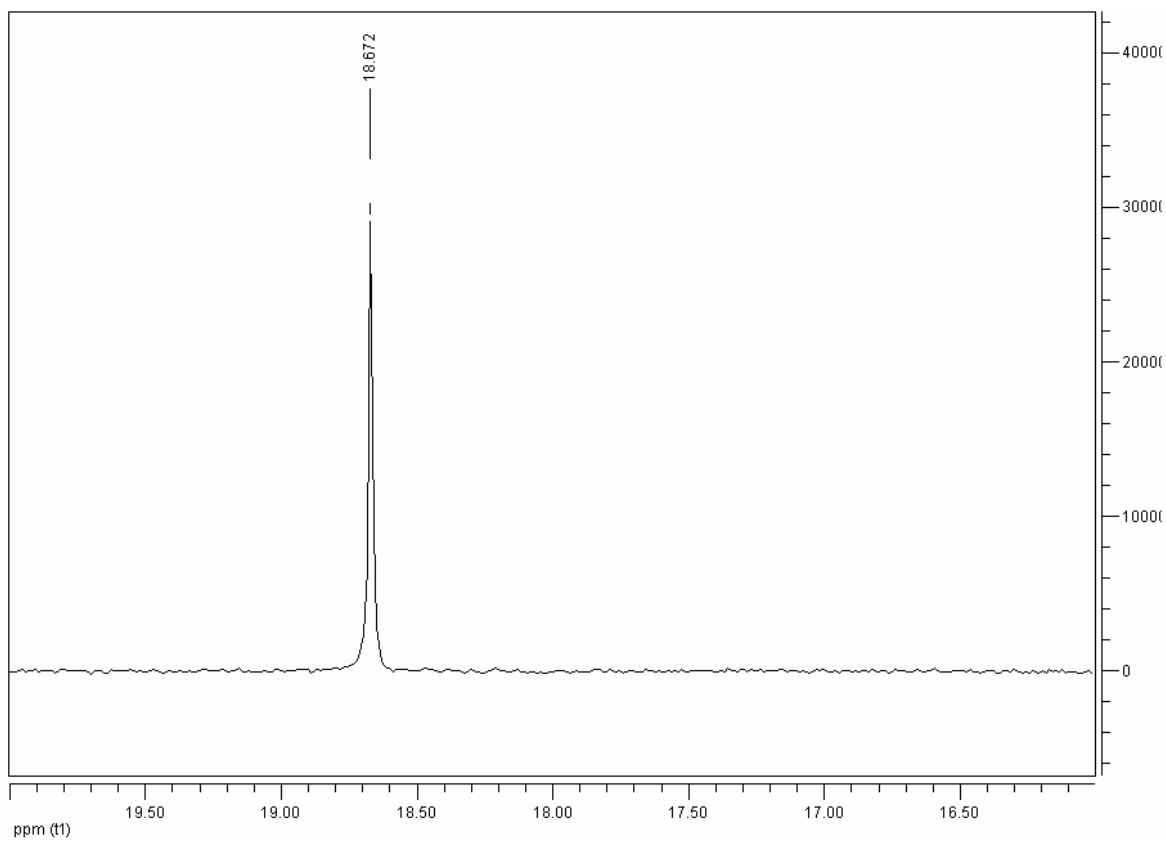

**Dimethyl hydroxy(5-oxo-2,5-dihydrofuran-2-yl)(*p*-tolyl)methylphosphonate (3g):**

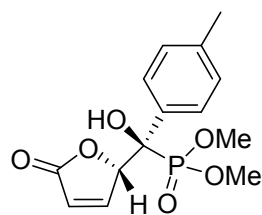

White solid; mp 127-130 °C;  $^{31}\text{P}$ -NMR (121 MHz,  $\text{CDCl}_3$ ):  $\delta$  20.99, 21.26;  $^1\text{H}$ -NMR (400 MHz,  $\text{CDCl}_3$ ):  $\delta$  2.34 (s, 3H,  $\text{CH}_3$ ), 3.67 (d,  $^3J_{\text{P-H}} = 10.4$  Hz, 3H,  $\text{P}(\text{OCH}_3)_2$ ), 3.77 (d, 3H,  $^3J_{\text{P-H}} = 10.5$  Hz,  $\text{P}(\text{OCH}_3)_2$ ), 5.58 (d,  $^3J_{\text{H-H}} = 5.6$  Hz, 1H,  $\text{HC}=\text{CHCH}$ ), 6.11 (dd,  $^3J_{\text{H-H}} = 5.7$  Hz, 1H,  $\text{HC}=\text{CHCH}$ ), 7.19 (d,  $^3J_{\text{H-H}} = 7.8$  Hz, 2H, Ph), 7.50 (d,  $^3J_{\text{H-H}} = 8.1$  Hz, 2H, Ph), 7.65 (d,  $^3J_{\text{H-H}} = 5.7$  Hz, 1H,  $\text{HC}=\text{CHCH}$ );  $^{13}\text{C}$ -NMR (100 MHz,  $\text{CDCl}_3$ ):  $\delta$  21.06, 54.54 (d,  $^2J_{\text{C,P}} = 7.7$  Hz,  $\text{P}(\text{OCH}_3)_2$ ), 54.81 (d,  $^2J_{\text{C,P}} = 7.4$  Hz,  $\text{P}(\text{OCH}_3)_2$ ), 76.65 (d,  $^1J_{\text{C,P}} = 162.5$  Hz,  $\text{CP}(\text{OCH}_3)_2$ ), 84.73 (d,  $^2J_{\text{C,P}} = 9.4$  Hz,  $\text{HC}=\text{CHCH}$ ), 122.96, 125.93 (d,  $^3J_{\text{C,P}} = 4.1$  Hz), 129.05, 132.07, 138.24 (d,  $^4J_{\text{C,P}} = 2.1$  Hz), 153.65 (d,  $^3J_{\text{C,P}} = 5.4$  Hz), 172.56; ESI-MS: 312.7 ( $[\text{M}+\text{H}]^+$ ); HRMS calcd for  $\text{C}_{14}\text{H}_{17}\text{O}_6\text{P}$ : 335.0655 ( $\text{M}+\text{Na}$ ) $^+$ , found: 335.0662.

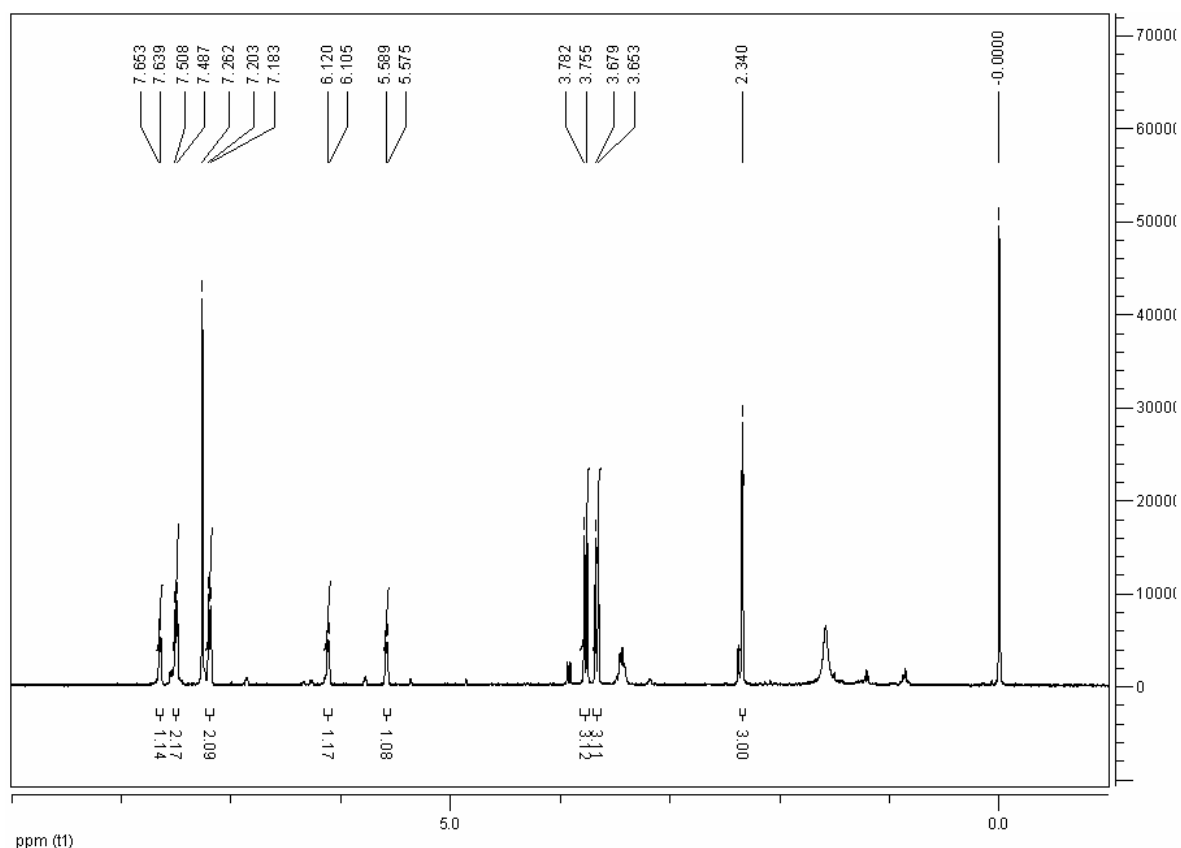

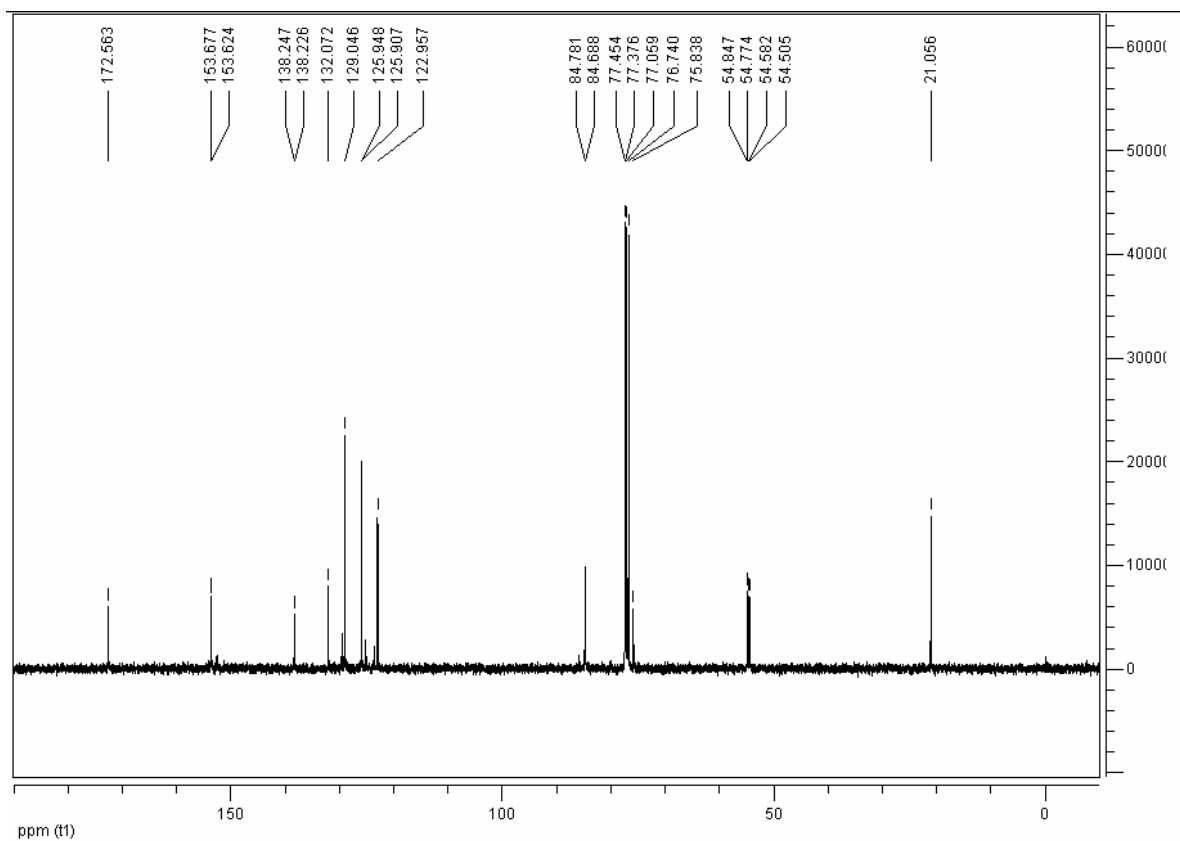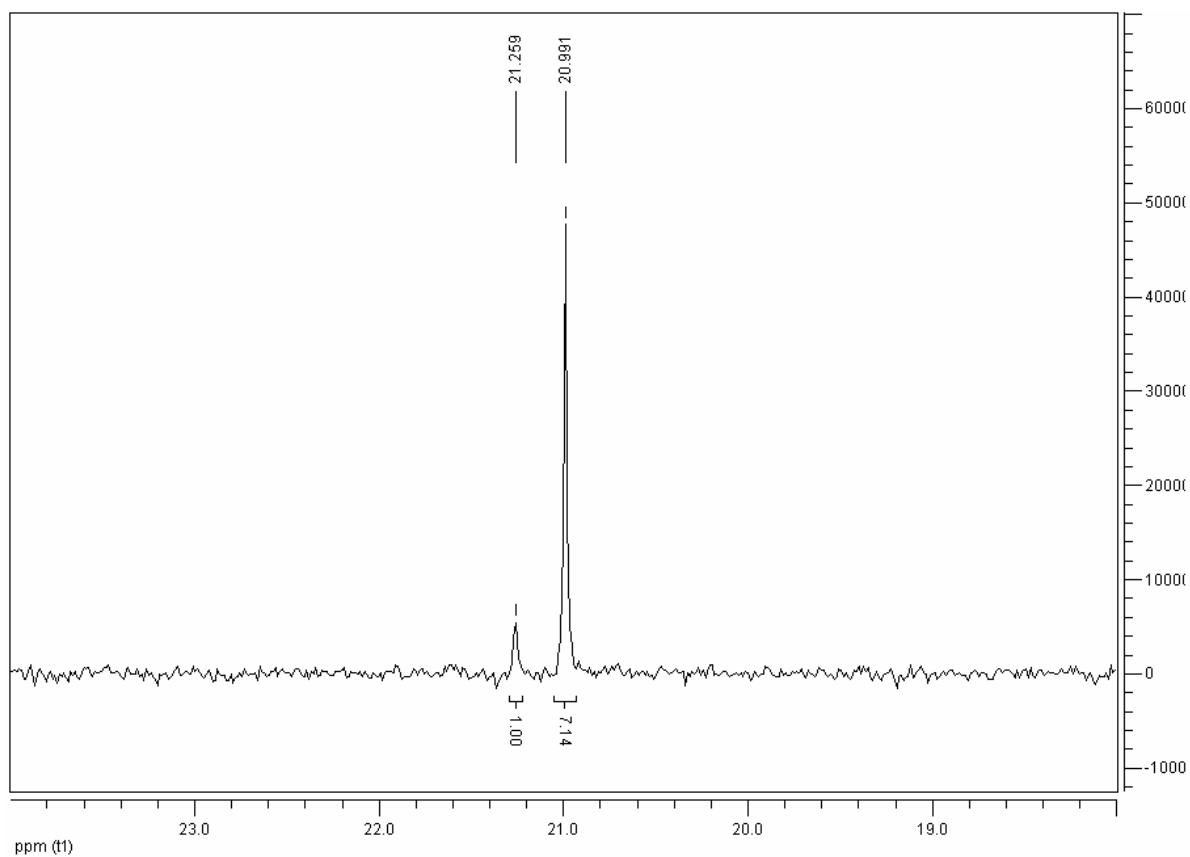



**Diethyl hydroxy(5-oxo-2,5-dihydrofuran-2-yl)(*p*-tolyl)methylphosphonate (3h):**

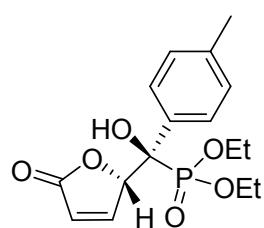

White solid; mp 87-89 °C;  $^{31}\text{P}$ -NMR (121 MHz,  $\text{CDCl}_3$ ):  $\delta$  18.86;  $^1\text{H}$ -NMR (400 MHz,  $\text{CDCl}_3$ ):  $\delta$  1.26 (t,  $^3J_{\text{H-H}} = 7.1$  Hz, 6H,  $\text{P}(\text{OCH}_2\text{CH}_3)_2$ ), 2.33 (s, 3H,  $\text{CH}_3$ ), 3.92-4.16 (m, 4H,  $\text{P}(\text{OCH}_2\text{CH}_3)_2$ ), 5.58 (t,  $^3J_{\text{H-H}} = 6.2$  Hz, 1H,  $\text{HC}=\text{CHCH}$ ), 6.12 (dd,  $^3J_{\text{H-H}} = 9.9$  Hz,  $^3J_{\text{H-H}} = 4.6$  Hz, 1H,  $\text{HC}=\text{CHCH}$ ), 7.18 (d,  $^3J_{\text{H-H}} = 7.8$  Hz, 2H, Ph), 7.50 (d,  $^3J_{\text{H-H}} = 7.8$  Hz, 2H, Ph), 7.66 (t,  $^3J_{\text{H-H}} = 6.2$  Hz, 1H,  $\text{HC}=\text{CHCH}$ );  $^{13}\text{C}$ -NMR (100 MHz,  $\text{CDCl}_3$ ):  $\delta$  16.31 (d,  $^3J_{\text{C,P}} = 2.5$  Hz,  $\text{P}(\text{OCH}_2\text{CH}_3)_2$ ), 16.37 (d,  $^3J_{\text{C,P}} = 2.5$  Hz,  $\text{P}(\text{OCH}_2\text{CH}_3)_2$ ), 21.07, 64.12 (d,  $^2J_{\text{C,P}} = 7.6$  Hz,  $\text{P}(\text{OCH}_2\text{CH}_3)_2$ ), 64.38 (d,  $^2J_{\text{C,P}} = 7.6$  Hz,  $\text{P}(\text{OCH}_2\text{CH}_3)_2$ ), 76.40 (d,  $^1J_{\text{C,P}} = 161.2$  Hz,  $\text{CP}(\text{OCH}_2\text{CH}_3)_2$ ), 85.10 (d,  $^2J_{\text{C,P}} = 10.4$  Hz,  $\text{HC}=\text{CHCH}$ ), 123.01, 125.94 (d,  $^4J_{\text{C,P}} = 4.3$  Hz), 128.97 (d,  $^3J_{\text{C,P}} = 5.6$  Hz), 132.42, 138.07 (d,  $^4J_{\text{C,P}} = 2.0$  Hz), 153.55 (d,  $^3J_{\text{C,P}} = 4.6$  Hz), 172.51; ESI-MS: 340.7 ( $[\text{M}+\text{H}]^+$ ); HRMS calcd for  $\text{C}_{16}\text{H}_{21}\text{O}_6\text{P}$ : 363.0968 ( $\text{M}+\text{Na}$ ) $^+$ , found: 363.0962.

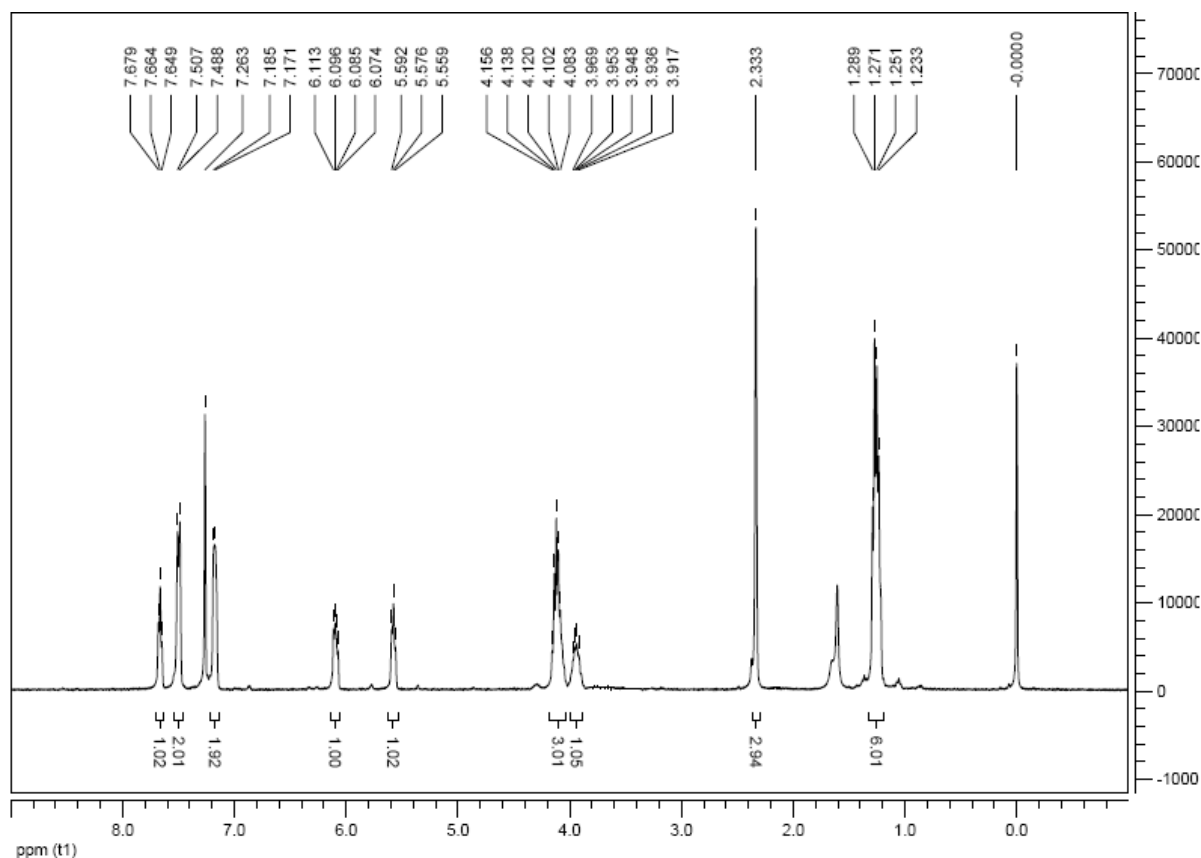

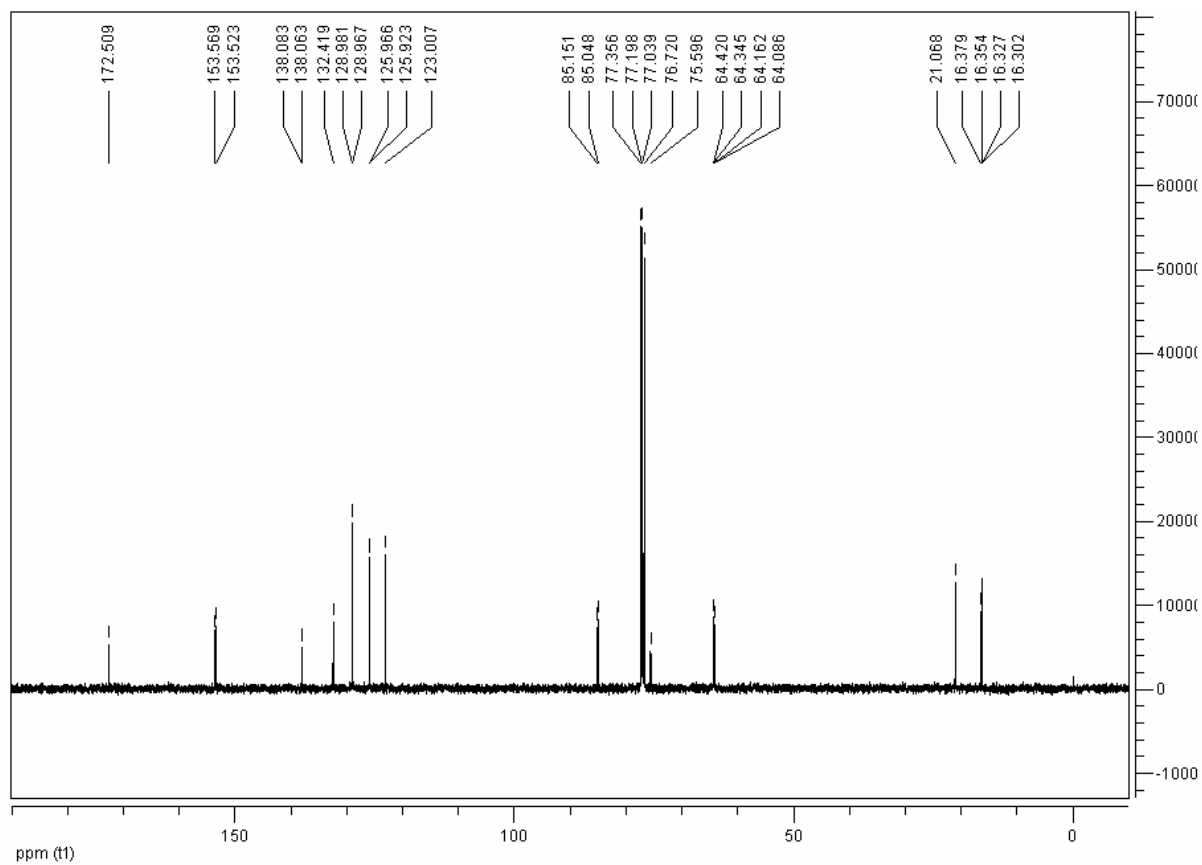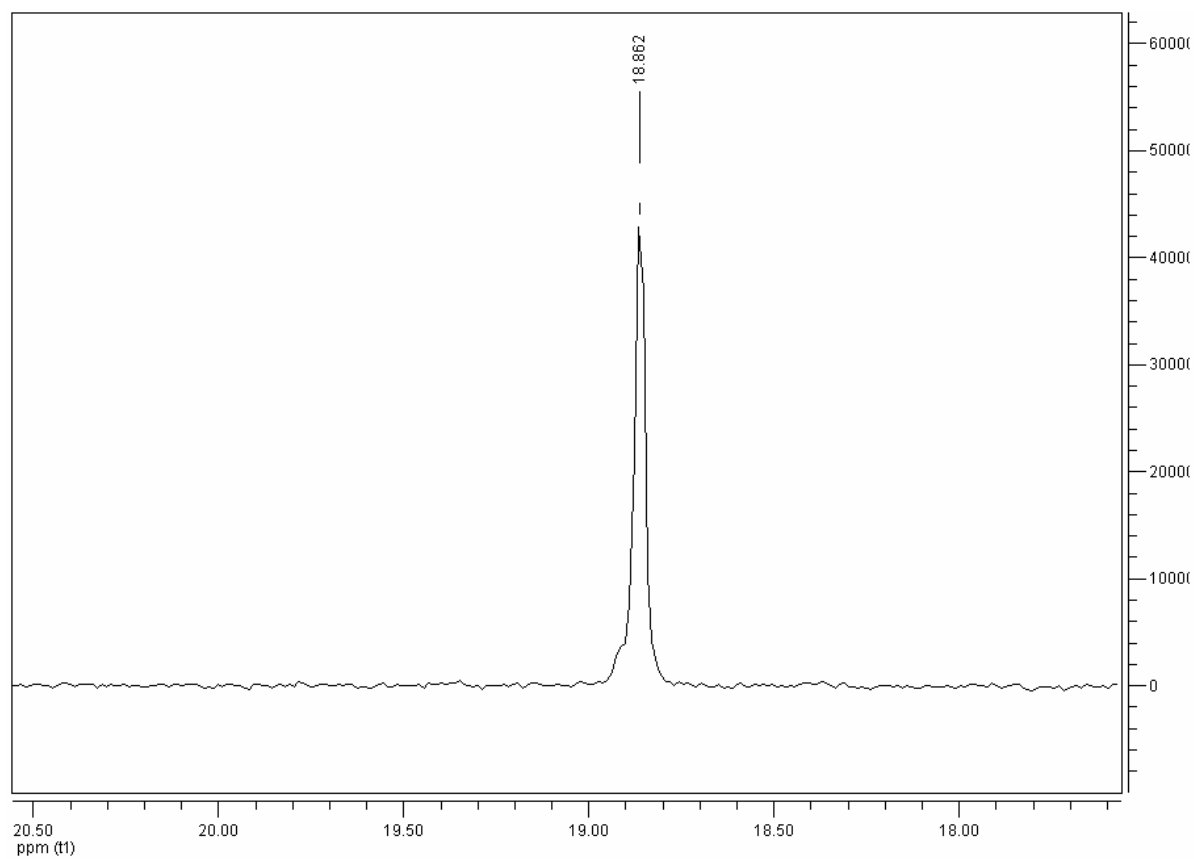

**Dimethyl hydroxy(5-oxo-2,5-dihydrofuran-2-yl)(*p*-methoxyphenyl)methylphosphonate (3i):**

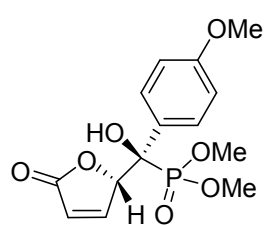

White solid; mp 82-84 °C;  $^{31}\text{P}$ -NMR (121 MHz,  $\text{CDCl}_3$ ):  $\delta$  21.15, 21.26;  $^1\text{H}$ -NMR (400 MHz,  $\text{CDCl}_3$ ):  $\delta$  3.71 (d,  $^3J_{\text{P-H}} = 10.3$  Hz, 3H,  $\text{P}(\text{OCH}_3)_2$ ), 3.77 (d,  $^3J_{\text{P-H}} = 10.4$  Hz, 3H,  $\text{P}(\text{OCH}_3)_2$ ), 3.80 (s, 3H,  $\text{CH}_3$ ), 5.54 (d,  $^3J_{\text{H-H}} = 5.5$  Hz, 1H,  $\text{HC}=\text{CHCH}$ ), 6.07 (dd,  $^3J_{\text{H-H}} = 5.4$  Hz, 1H,  $\text{HC}=\text{CHCH}$ ), 6.89 (d,  $^3J_{\text{H-H}} = 7.9$  Hz, 2H, Ph), 7.53 (d,  $^3J_{\text{H-H}} = 8.3$  Hz, 2H, Ph), 7.61 (d,  $^3J_{\text{H-H}} = 5.5$  Hz, 1H,  $\text{HC}=\text{CHCH}$ );  $^{13}\text{C}$ -NMR (100 MHz,  $\text{CDCl}_3$ ):  $\delta$  54.51 (d,  $^2J_{\text{C,P}} = 7.5$  Hz,  $\text{P}(\text{OCH}_3)_2$ ), 54.83 (d,  $^2J_{\text{C,P}} = 7.3$  Hz,  $\text{P}(\text{OCH}_3)_2$ ), 72.15, 76.48 (d,  $^1J_{\text{C,P}} = 162.7$  Hz,  $\text{CP}(\text{OCH}_3)_2$ ), 84.77 (d,  $^2J_{\text{C,P}} = 9.9$  Hz,  $\text{HC}=\text{CHCH}$ ), 113.70, 123.02, 127.38 (d,  $^3J_{\text{C,P}} = 3.8$  Hz), 152.82, 153.62 (d,  $^3J_{\text{C,P}} = 5.2$  Hz), 159.57, 172.51; ESI-MS: 328.6 ( $[\text{M}+\text{H}]^+$ ); HRMS calcd for  $\text{C}_{14}\text{H}_{17}\text{O}_7\text{P}$ : 351.0600 ( $\text{M}+\text{Na}^+$ ), found: 351.0604.

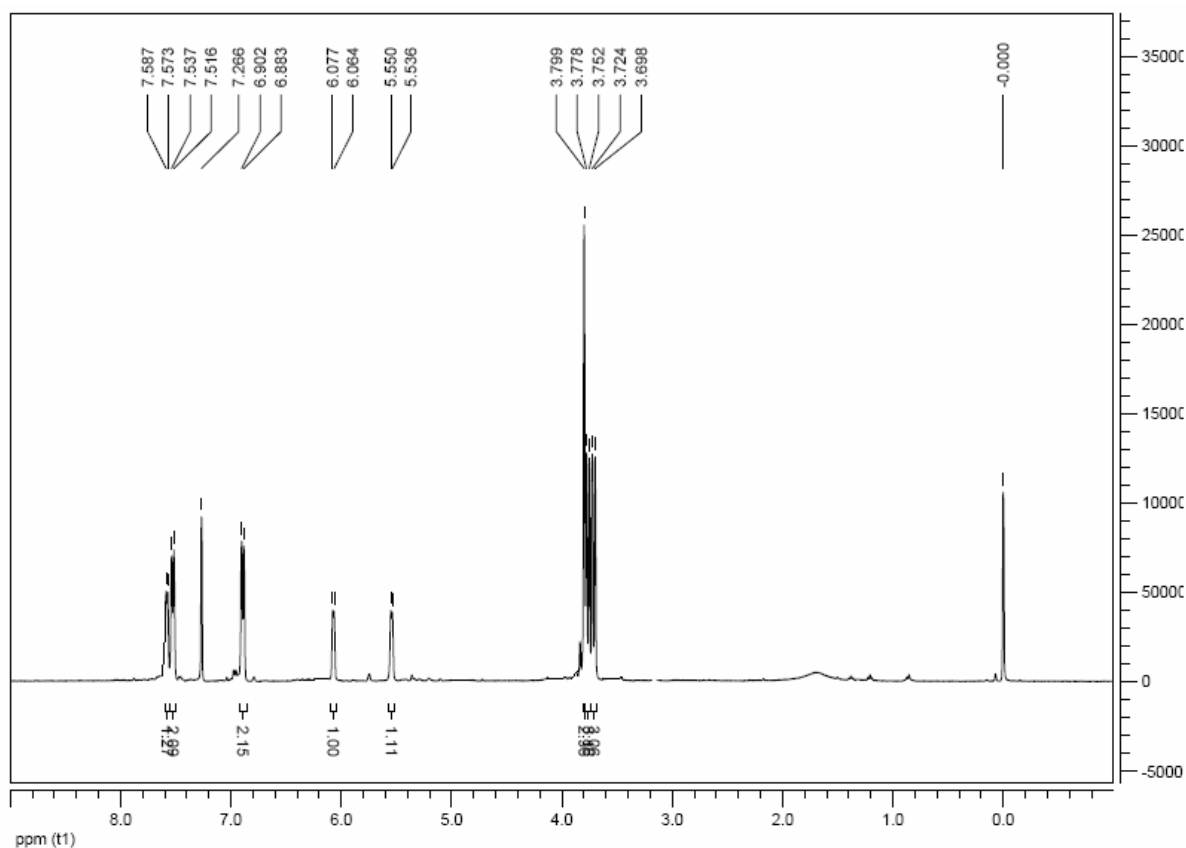

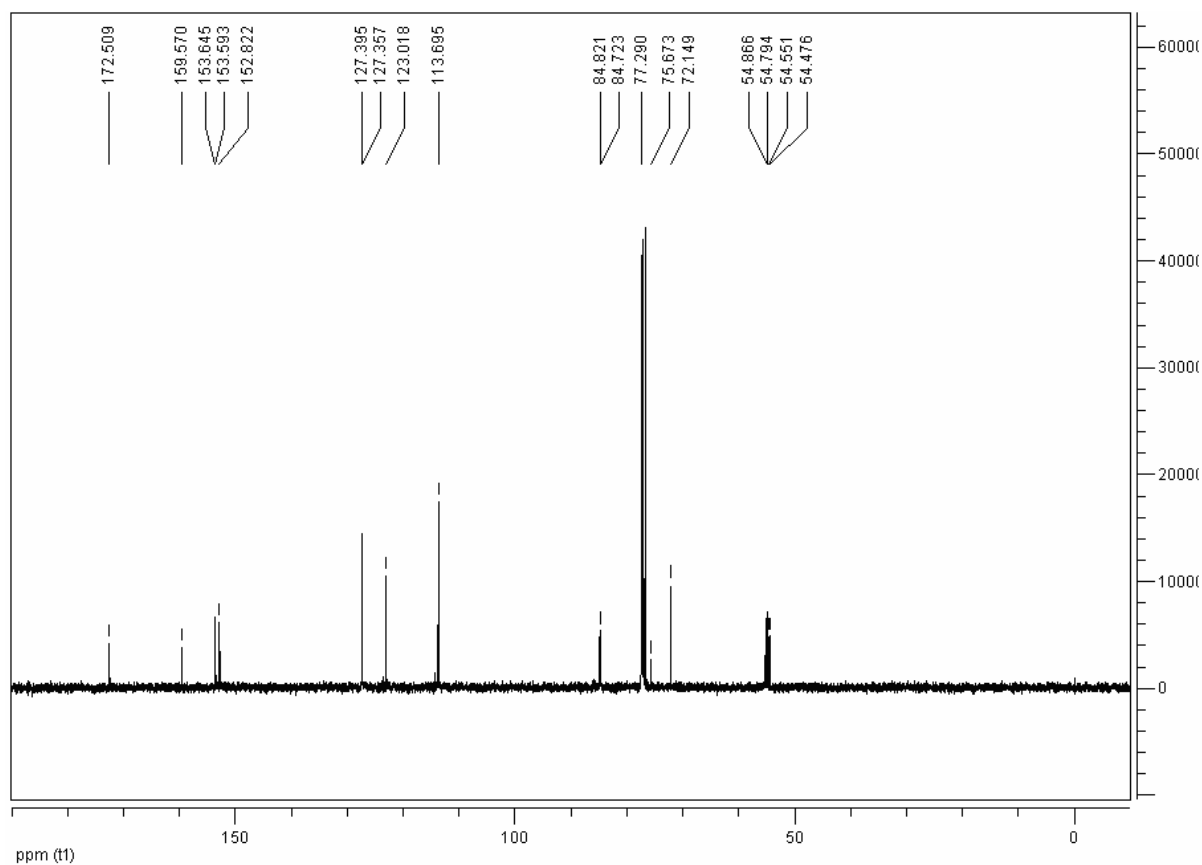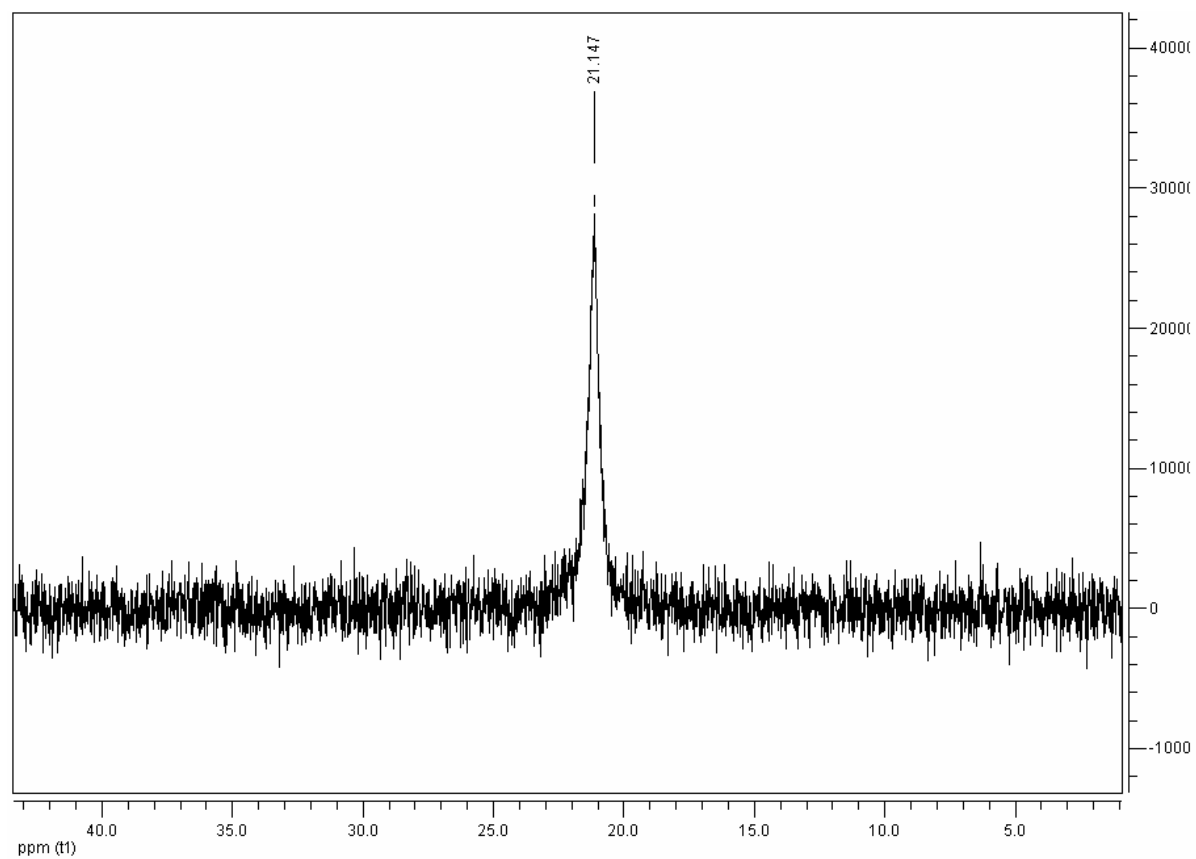

**Diethyl hydroxy(5-oxo-2,5-dihydrofuran-2-yl)(*p*-methoxyphenyl)methylphosphonate (3j):**

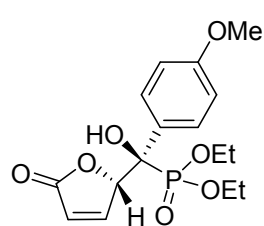

White solid; mp 72-75 °C;  $^{31}\text{P}$ -NMR (121 MHz,  $\text{CDCl}_3$ ):  $\delta$  18.97;  $^1\text{H}$ -NMR (400 MHz,  $\text{CDCl}_3$ ):  $\delta$  1.23-1.30 (m, 6H,  $\text{P}(\text{OCH}_2\text{CH}_3)_2$ ), 3.81 (s, 3H,  $\text{CH}_3$ ), 3.91-4.18 (m, 4H,  $\text{P}(\text{OCH}_2\text{CH}_3)_2$ ), 5.57 (d,  $^3J_{\text{H-H}} = 4.6$  Hz, 1H,  $\text{HC}=\text{CHCH}$ ), 6.10 (dd,  $^3J_{\text{H-H}} = 4.6$  Hz, 1H,  $\text{HC}=\text{CHCH}$ ), 7.18 (d,  $^3J_{\text{H-H}} = 5.6$  Hz, 2H, Ph), 7.50 (d,  $^3J_{\text{H-H}} = 7.8$  Hz, 2H, Ph), 7.66 (d,  $^3J_{\text{H-H}} = 6.0$  Hz, 1H,  $\text{HC}=\text{CHCH}$ );  $^{13}\text{C}$ -NMR (100 MHz,  $\text{CDCl}_3$ ):  $\delta$  16.32, 55.17, 64.10 (d,  $^2J_{\text{C,P}} = 7.6$  Hz,  $\text{P}(\text{OCH}_2\text{CH}_3)_2$ ), 64.36 (d,  $^2J_{\text{C,P}} = 7.4$  Hz,  $\text{P}(\text{OCH}_2\text{CH}_3)_2$ ), 76.23 (d,  $^1J_{\text{C,P}} = 162.1$  Hz,  $\text{CP}(\text{OCH}_2\text{CH}_3)_2$ ), 84.99 (d,  $^2J_{\text{C,P}} = 10.1$  Hz,  $\text{HC}=\text{CHCH}$ ), 113.56, 122.94, 127.27, 127.44 (d,  $^3J_{\text{C,P}} = 4.0$  Hz), 153.62 (d,  $^3J_{\text{C,P}} = 4.8$  Hz), 159.47 (d,  $^4J_{\text{C,P}} = 1.2$  Hz), 172.49; ESI-MS: 356.7 ( $[\text{M}+\text{H}]^+$ ); HRMS calcd for  $\text{C}_{16}\text{H}_{21}\text{O}_6\text{P}$ : 379.0917 ( $\text{M}+\text{Na}^+$ ), found: 379.0925.

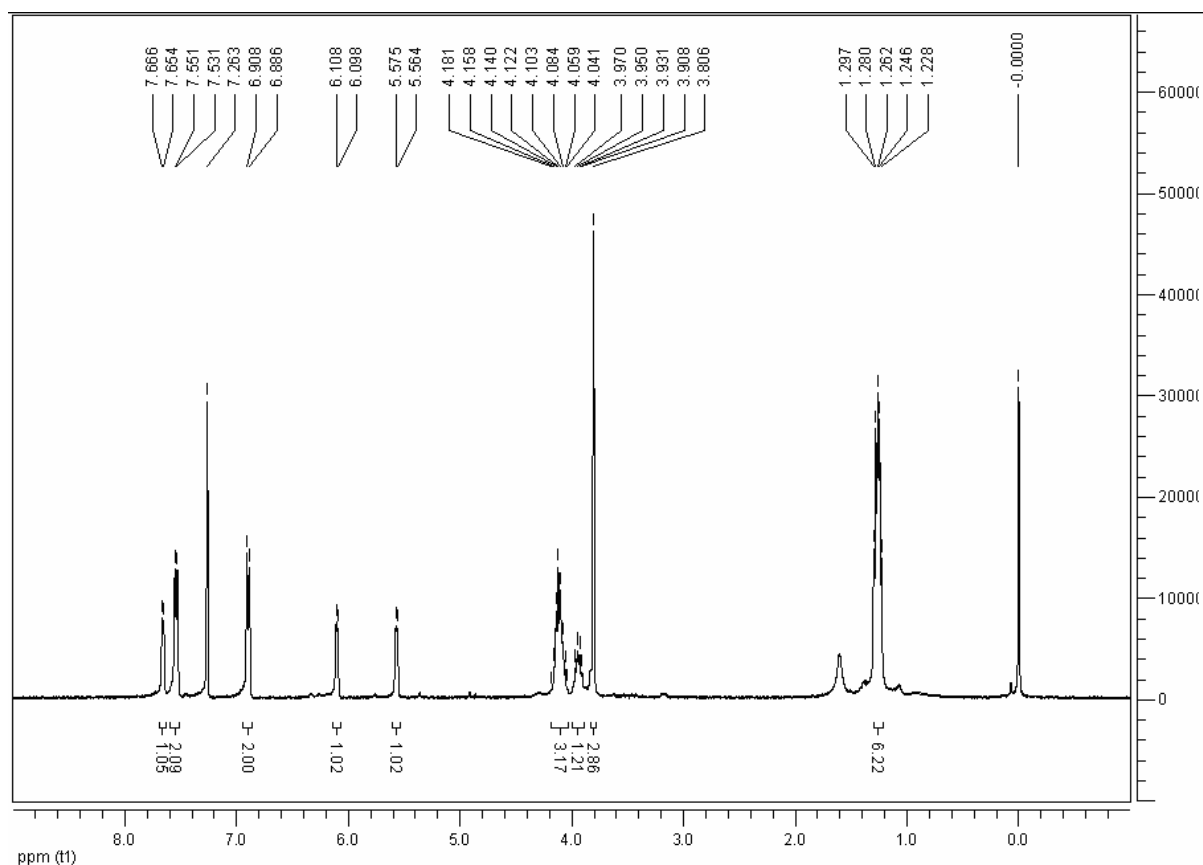

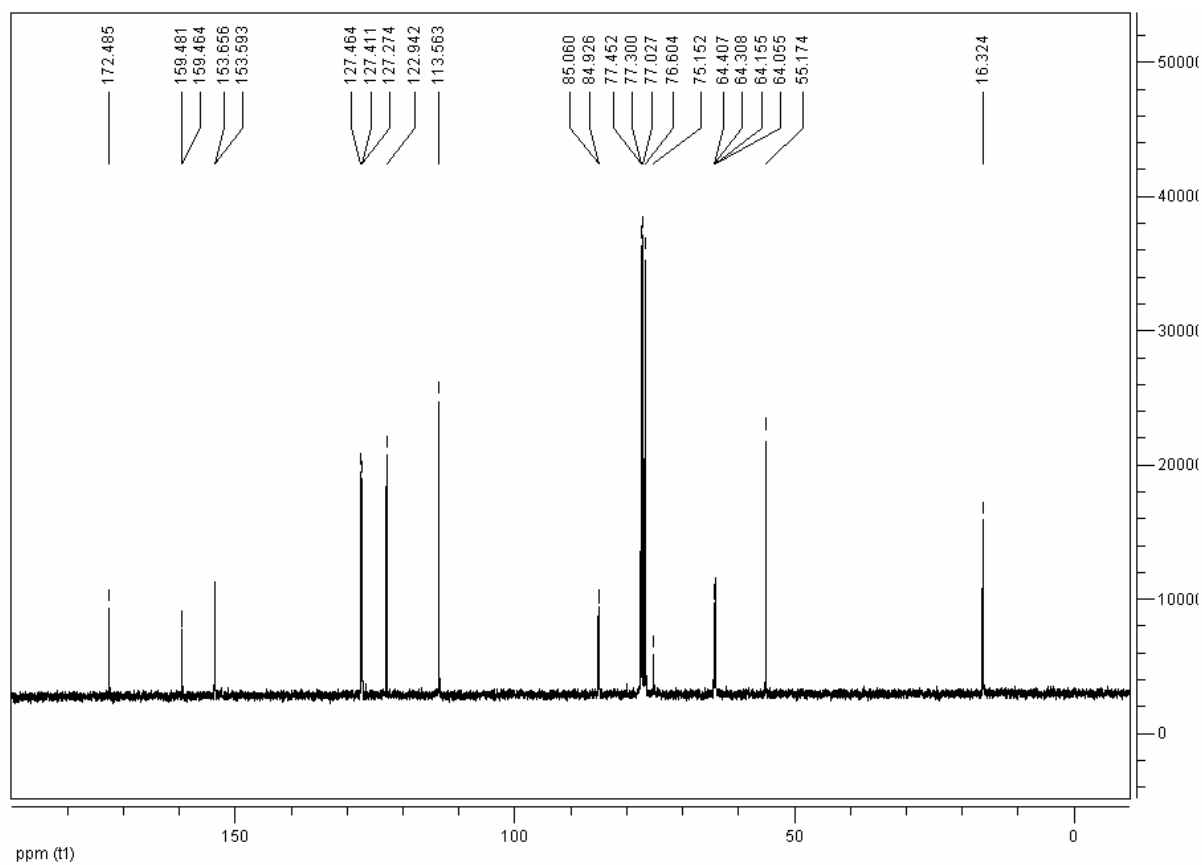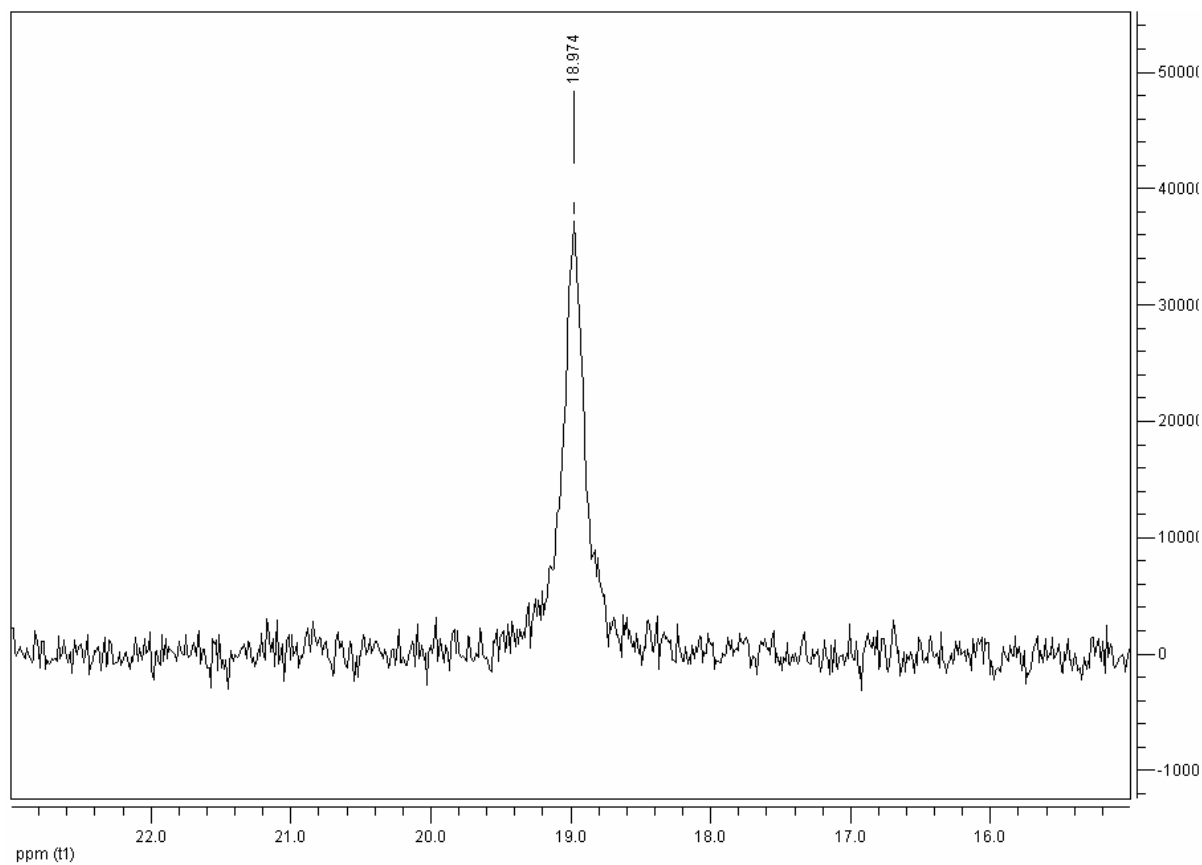

**Diethyl hydroxy(5-oxo-2,5-dihydrofuran-2-yl)(*p*-bromophenyl)methylphosphonate (3k):**

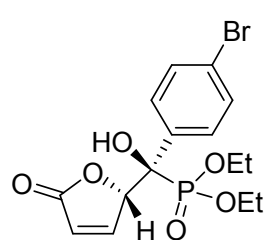

White oil;  $^{31}\text{P}$ -NMR (121 MHz,  $\text{CDCl}_3$ ):  $\delta$  18.18;  $^1\text{H}$ -NMR (400 MHz,  $\text{CDCl}_3$ ):  $\delta$  1.25-1.33 (m, 6H,  $\text{P}(\text{OCH}_2\text{CH}_3)_2$ ), 4.08-4.16 (m, 4H,  $\text{P}(\text{OCH}_2\text{CH}_3)_2$ ), 5.56 (d,  $^3J_{\text{H-H}} = 3.6$  Hz, 1H,  $\text{HC}=\text{CHCH}$ ), 6.05 (d,  $^3J_{\text{H-H}} = 5.6$  Hz, 1H,  $\text{HC}=\text{CHCH}$ ), 7.48 (m, 3H, Ph,  $\text{HC}=\text{CHCH}$ ), 7.60 (d,  $^3J_{\text{H-H}} = 6.0$  Hz, 2H, Ph);  $^{13}\text{C}$ -NMR (100 MHz,  $\text{CDCl}_3$ ):  $\delta$  16.32 (t,  $^3J_{\text{C,P}} = 5.6$  Hz,  $\text{P}(\text{OCH}_2\text{CH}_3)_2$ ), 64.44 (d,  $^2J_{\text{C,P}} = 7.7$  Hz,  $\text{P}(\text{OCH}_2\text{CH}_3)_2$ ), 64.58 (d,  $^2J_{\text{C,P}} = 7.7$  Hz,  $\text{P}(\text{OCH}_2\text{CH}_3)_2$ ), 76.23 (d,  $^1J_{\text{C,P}} = 161.7$  Hz,  $\text{CP}(\text{OCH}_2\text{CH}_3)_2$ ), 84.61 (d,  $^2J_{\text{C,P}} = 9.8$  Hz,  $\text{HC}=\text{CHCH}$ ), 121.54, 123.27, 127.98 (d,  $^3J_{\text{C,P}} = 4.1$  Hz), 131.30 (d,  $^3J_{\text{C,P}} = 1.8$  Hz), 134.78, 152.91, 173.74; ESI-MS: 404.7 ( $[\text{M}+\text{H}]^+$ ); HRMS calcd for  $\text{C}_{15}\text{H}_{18}\text{BrO}_6\text{P}$ : 426.9916 ( $\text{M}+\text{Na}^+$ ), found: 426.9919.

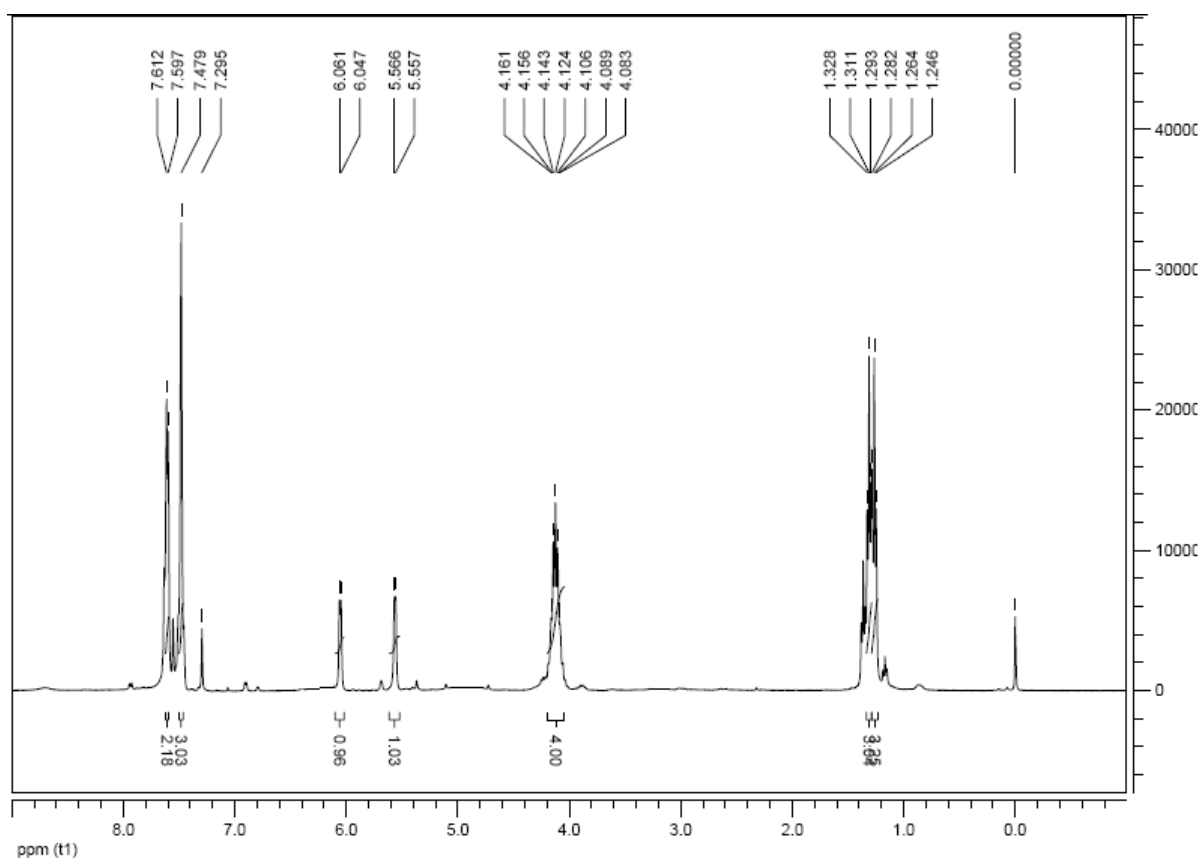

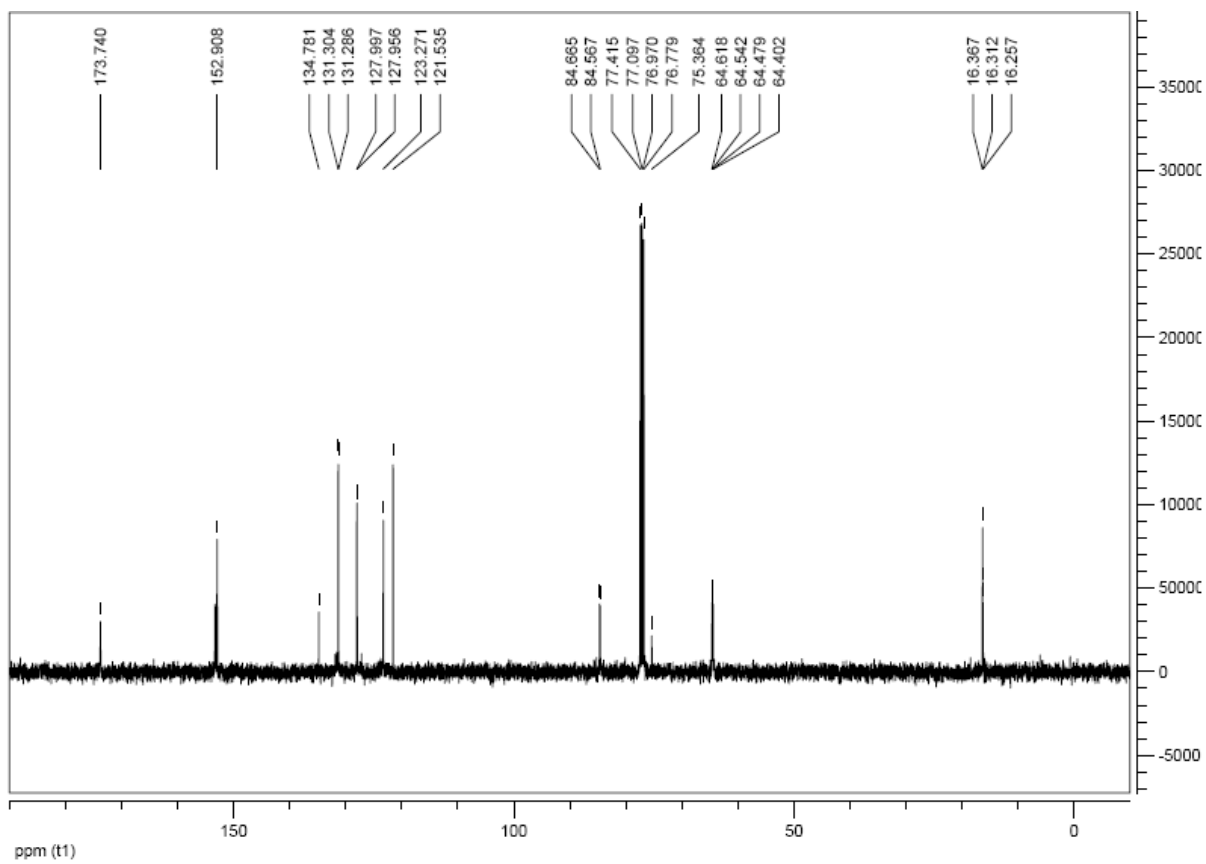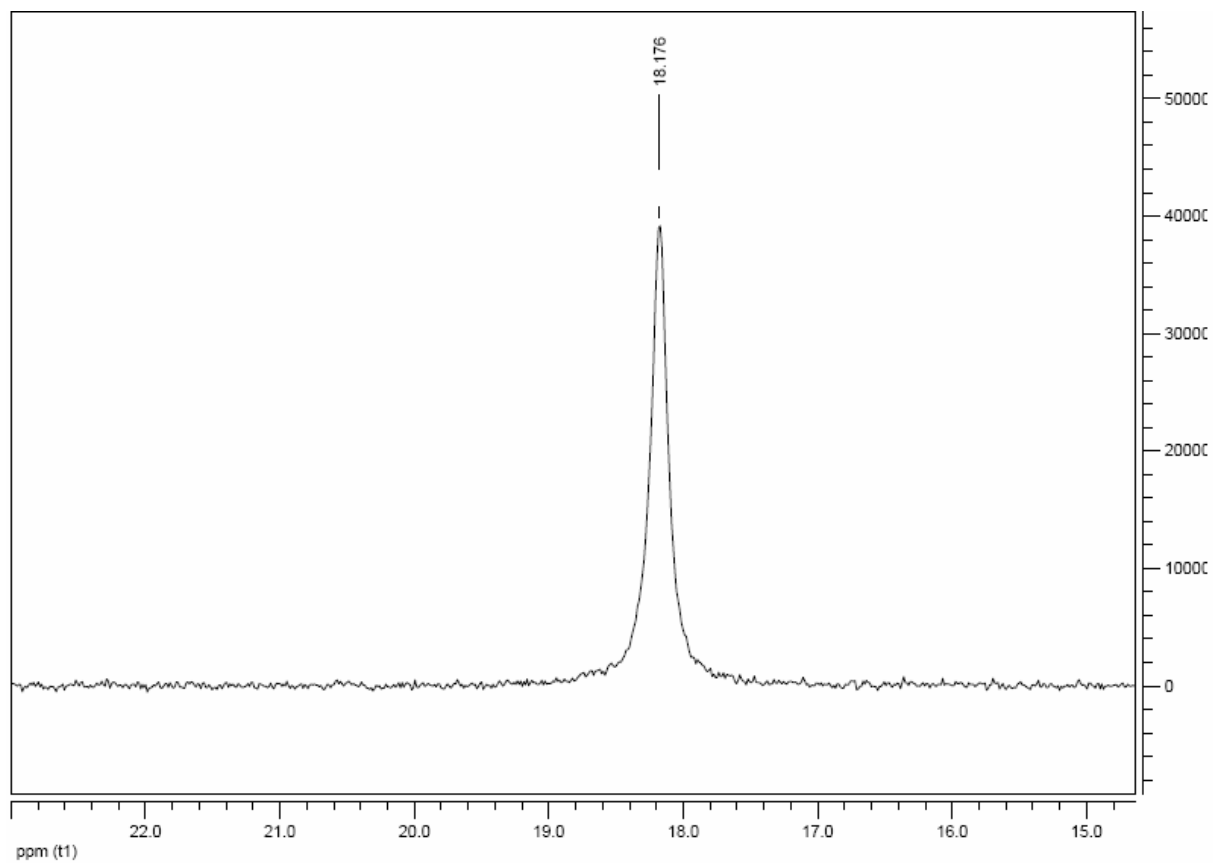



### Diethyl 1-(2,5-dihydro-5-oxofuran-2-yl)-1-hydroxyethylphosphonate (3l):

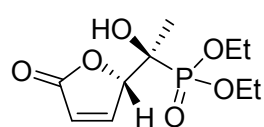

Colorless oil;  $^{31}\text{P}$ -NMR (121 MHz,  $\text{CDCl}_3$ ):  $\delta$  21.87, 22.50;  $^1\text{H}$ -NMR (400 MHz,  $\text{CDCl}_3$ ):  $\delta$  1.26-1.31 (m, 6H,  $\text{P}(\text{OCH}_2\text{CH}_3)_2$ ), 1.39 (d,  $^3J_{\text{P-H}} = 15.1$  Hz,  $\text{CCH}_3$ ), 4.12-4.18 (m, 4H,  $\text{P}(\text{OCH}_2\text{CH}_3)_2$ ), 4.65 (s, 1H,  $\text{OH}$ ), 5.16 (d,  $^3J_{\text{H-H}} = 5.6$  Hz, 1H,  $\text{HC}=\text{CHCH}$ ), 6.13 (d,  $^3J_{\text{H-H}} = 4.5$  Hz, 1H,  $\text{HC}=\text{CHCH}$ ), 7.64 (d,  $^3J_{\text{H-H}} = 5.0$  Hz, 1H,  $\text{HC}=\text{CHCH}$ );  $^{13}\text{C}$ -NMR (100 MHz,  $\text{CDCl}_3$ ):  $\delta$  15.43 (d,  $^3J_{\text{C,P}} = 5.2$  Hz,  $\text{P}(\text{OCH}_2\text{CH}_3)_2$ ), 18.15 (d,  $^2J_{\text{C,P}} = 1.8$  Hz,  $\text{CCH}_3$ ), 62.61 (d,  $^2J_{\text{C,P}} = 7.5$  Hz,  $\text{P}(\text{OCH}_2\text{CH}_3)_2$ ), 62.89 (d,  $^2J_{\text{C,P}} = 7.3$  Hz,  $\text{P}(\text{OCH}_2\text{CH}_3)_2$ ), 71.48 (d,  $^1J_{\text{C,P}} = 166.3$  Hz,  $\text{CP}(\text{OCH}_2\text{CH}_3)_2$ ), 83.78 (d,  $^2J_{\text{C,P}} = 11.0$  Hz,  $\text{HC}=\text{CHCH}$ ), 121.65, 153.10 (d,  $^3J_{\text{C,P}} = 4.3$  Hz), 171.86; ESI-MS: 286.8 ( $[\text{M}+\text{Na}]^+$ ); HRMS calcd for  $\text{C}_{10}\text{H}_{17}\text{O}_6\text{P}$ : 287.0655 ( $\text{M}+\text{Na}$ ) $^+$ , found: 287.0649.

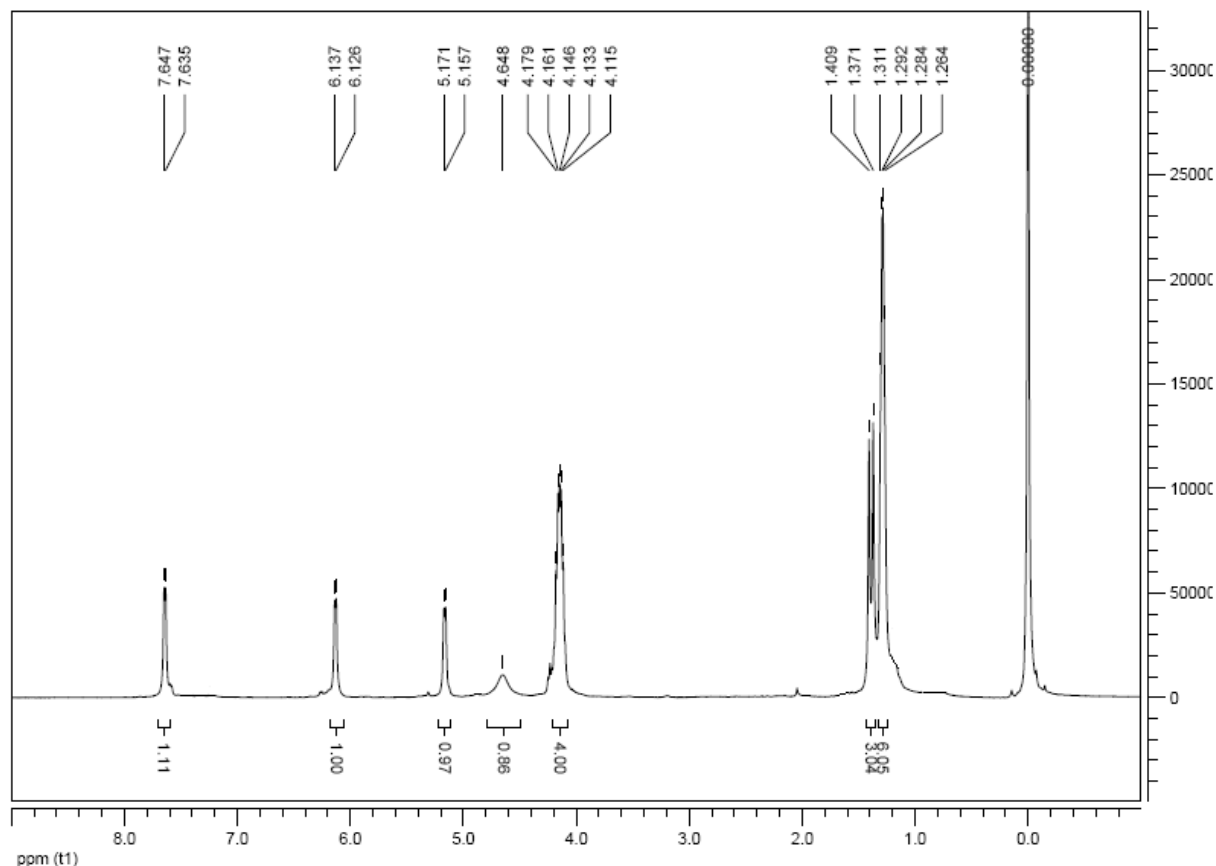

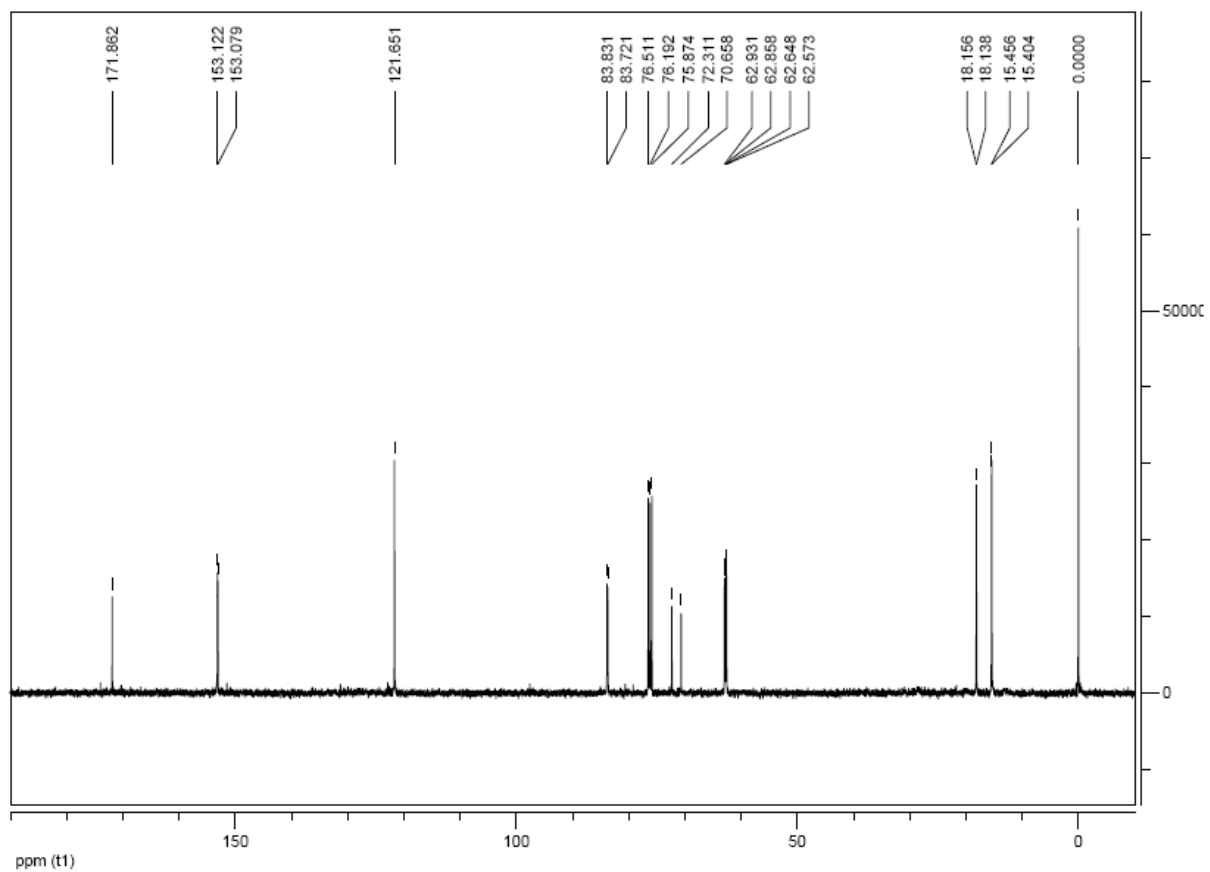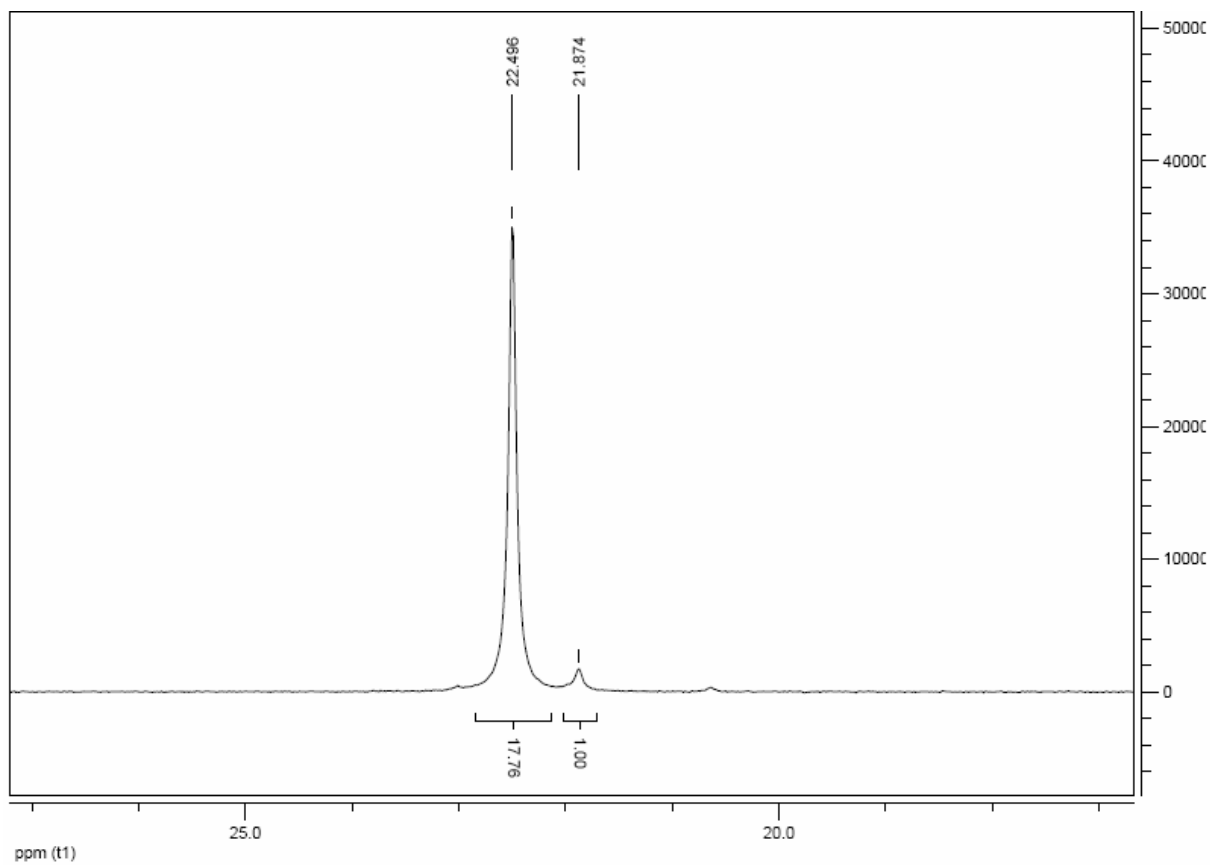

### Dimethyl 1-(2,5-dihydro-5-oxofuran-2-yl)-1-hydroxypropylphosphonate (3m):

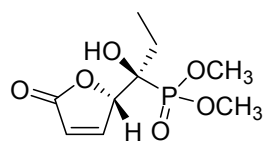

Colorless oil;  $^{31}\text{P}$ -NMR (121 MHz,  $\text{CDCl}_3$ ):  $\delta$  24.53, 24.59;  $^1\text{H}$ -NMR (400 MHz,  $\text{CDCl}_3$ ):  $\delta$  1.08 (t, 3H,  $^3J_{\text{H-H}} = 7.4$  Hz,  $\text{CH}_2\text{CH}_3$ ), 1.86-2.02 (m, 2H,  $\text{CH}_2\text{CH}_3$ ), 3.85 (t, 6H,  $^3J_{\text{P-H}} = 10.5$  Hz,  $\text{P}(\text{OCH}_3)_2$ ), 5.28 (td,  $^3J_{\text{H-H}} = 7.4$  Hz,  $^3J_{\text{H-H}} = 1.8$  Hz, 1H,  $\text{HC}=\text{CHCH}$ ), 6.20 (dd,  $^3J_{\text{H-H}} = 5.8$  Hz,  $^3J_{\text{H-H}} = 1.9$  Hz, 1H,  $\text{HC}=\text{CHCH}$ ), 7.65 (dd,  $^3J_{\text{H-H}} = 5.8$  Hz,  $^3J_{\text{H-H}} = 1.2$  Hz, 1H,  $\text{HC}=\text{CHCH}$ );  $^{13}\text{C}$ -NMR (100 MHz,  $\text{CDCl}_3$ ):  $\delta$  7.14 (d,  $^2J_{\text{C,P}} = 3.1$  Hz,  $\text{CCH}_2\text{CH}_3$ ), 26.26 (d,  $^2J_{\text{C,P}} = 2.0$  Hz,  $\text{CCH}_2\text{CH}_3$ ), 52.70 (d,  $^2J_{\text{C,P}} = 7.6$  Hz,  $\text{P}(\text{OCH}_3)_2$ ), 53.35 (d,  $^2J_{\text{C,P}} = 7.4$  Hz,  $\text{P}(\text{OCH}_3)_2$ ), 75.00 (d,  $^1J_{\text{C,P}} = 162.1$  Hz,  $\text{CP}(\text{OCH}_2\text{CH}_3)_2$ ), 82.60 (d,  $^2J_{\text{C,P}} = 11.8$  Hz,  $\text{HC}=\text{CHCH}$ ), 121.62, 152.77 (d,  $^3J_{\text{C,P}} = 3.2$  Hz), 171.70; ESI-MS: 272.6 ( $[\text{M}+\text{Na}]^+$ ); HRMS calcd for  $\text{C}_9\text{H}_{15}\text{O}_6\text{P}$ : 273.0498 ( $[\text{M}+\text{Na}]^+$ ), found: 274.0506.

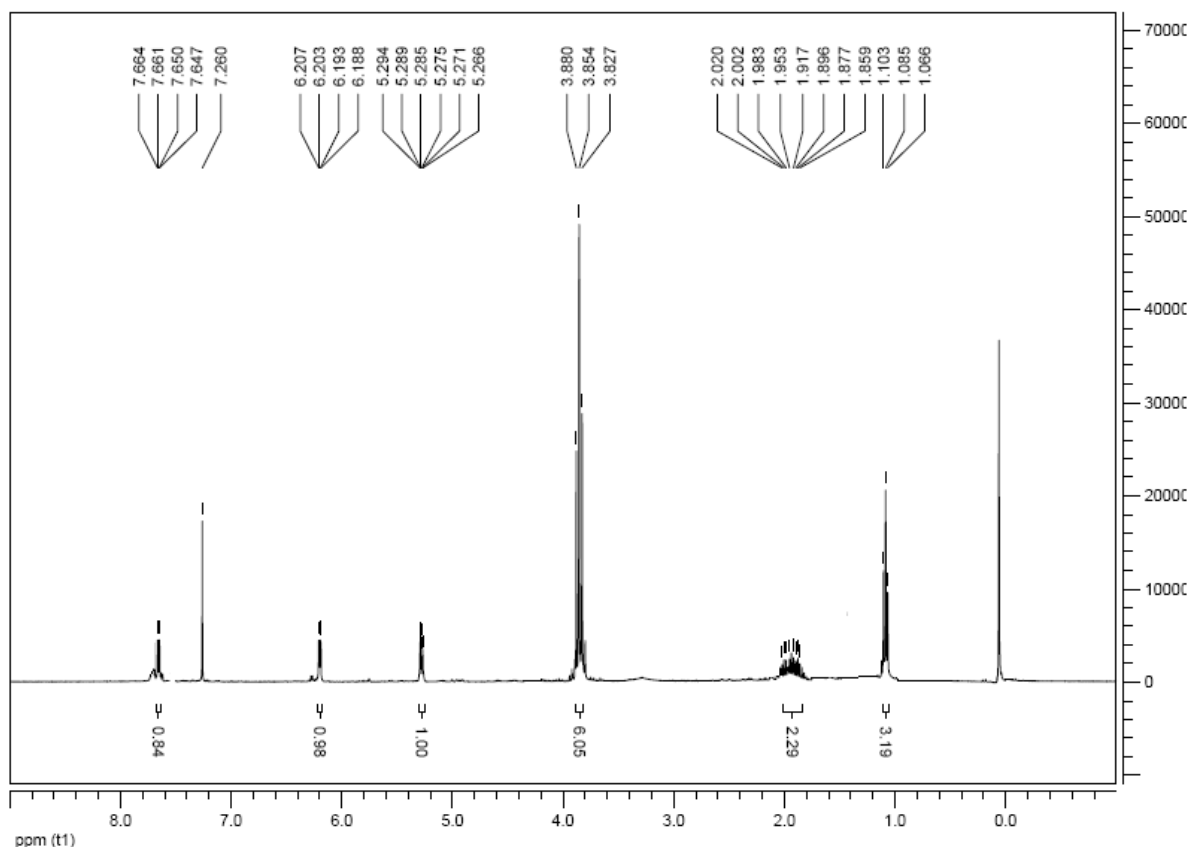

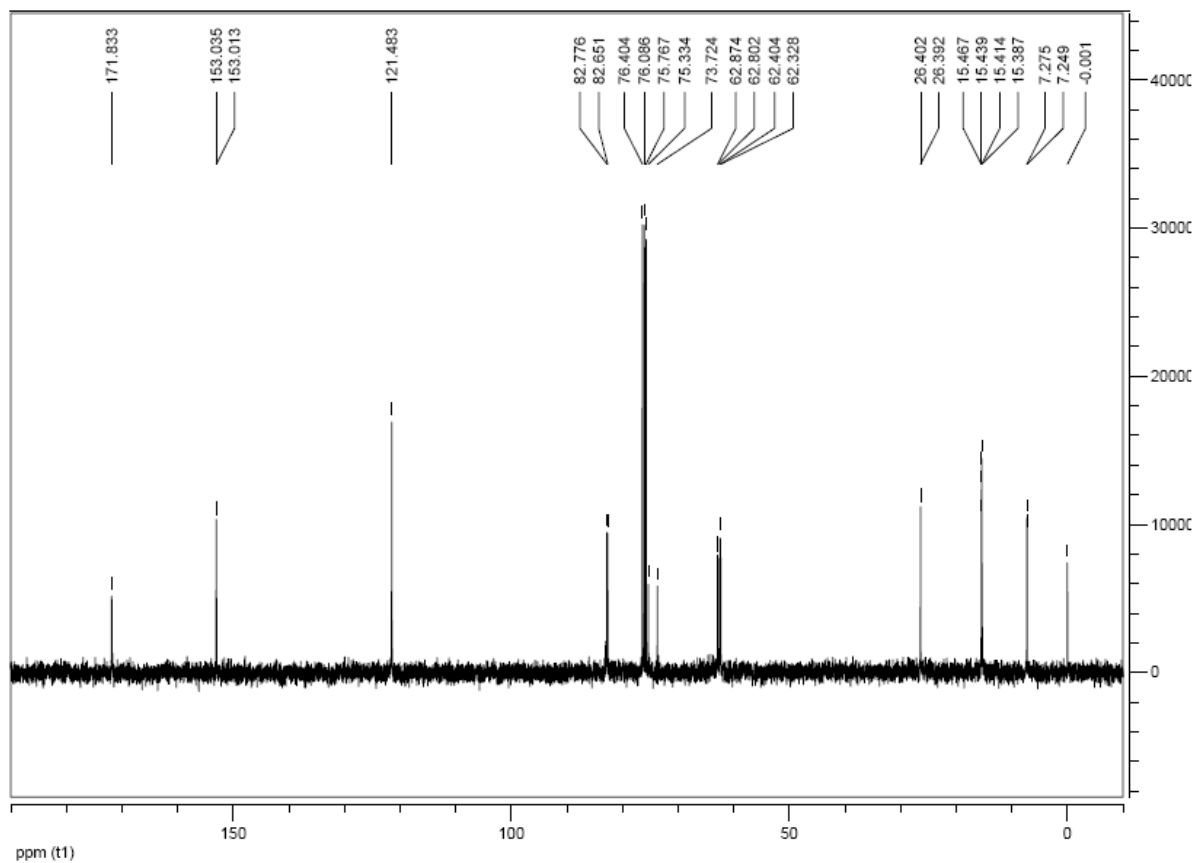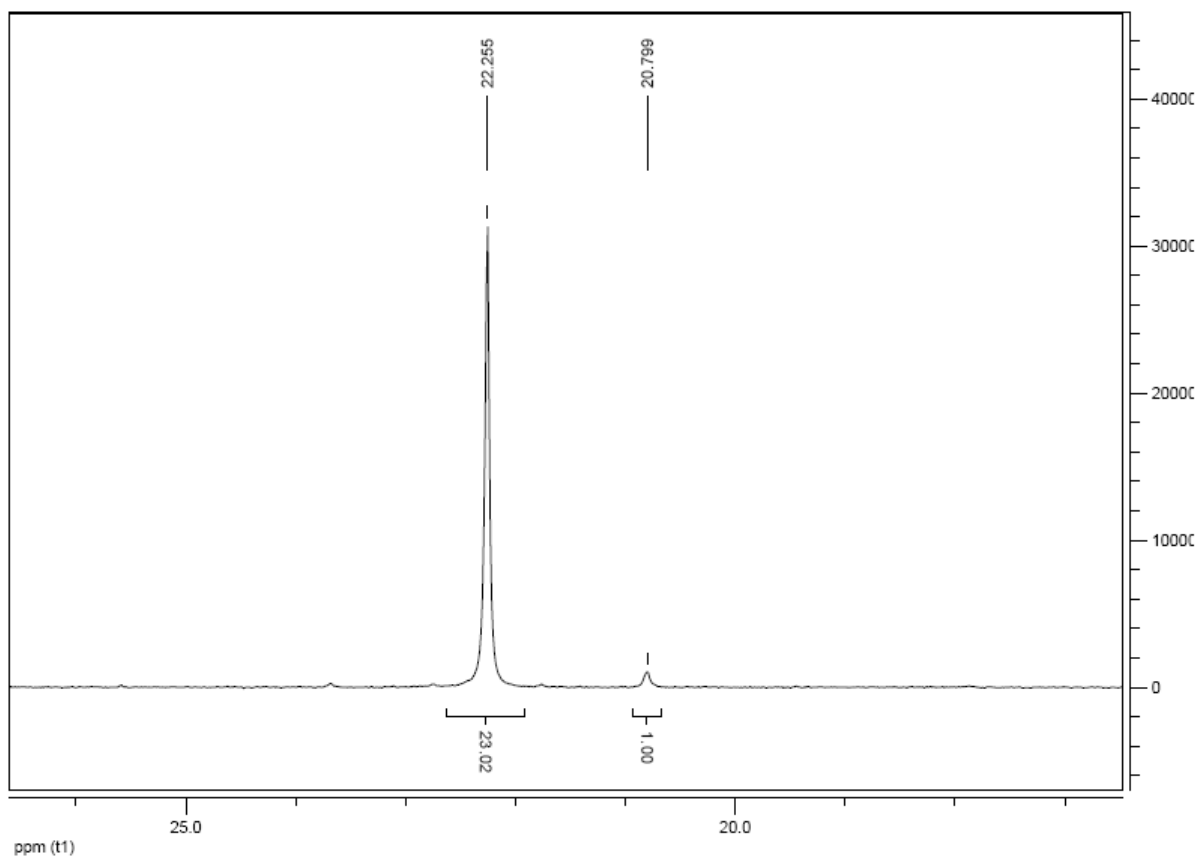

### Diethyl 1-(2,5-dihydro-5-oxofuran-2-yl)-1-hydroxypropylphosphonate (3n):

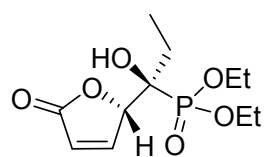

Colorless oil;  $^{31}\text{P}$ -NMR (121 MHz,  $\text{CDCl}_3$ ):  $\delta$  20.80, 22.26;  $^1\text{H}$ -NMR (400 MHz,  $\text{CDCl}_3$ ):  $\delta$  1.03 (t, 3H,  $^3J_{\text{H-H}} = 7.5$  Hz,  $\text{CH}_2\text{CH}_3$ ), 1.29 (t, 6H,  $^3J_{\text{H-H}} = 7.0$  Hz,  $\text{P}(\text{OCH}_2\text{CH}_3)_2$ ), 1.81-1.95 (m, 2H,  $\text{CH}_2\text{CH}_3$ ), 4.11-4.20 (m, 4H,  $\text{P}(\text{OCH}_2\text{CH}_3)_2$ ), 5.23 (d,  $^3J_{\text{H-H}} = 6.5$  Hz, 1H,  $\text{HC}=\text{CHCH}$ ), 6.11 (d,  $^3J_{\text{H-H}} = 5.0$  Hz, 1H,  $\text{HC}=\text{CHCH}$ ), 7.63 (d,  $^3J_{\text{H-H}} = 5.8$  Hz, 1H,  $\text{HC}=\text{CHCH}$ );  $^{13}\text{C}$ -NMR (100 MHz,  $\text{CDCl}_3$ ):  $\delta$  7.26 (d,  $^3J_{\text{C,P}} = 2.6$  Hz,  $\text{CCH}_2\text{CH}_3$ ), 15.40 (d,  $^3J_{\text{C,P}} = 2.7$  Hz,  $\text{P}(\text{OCH}_2\text{CH}_3)_2$ ), 15.45 (d,  $^3J_{\text{C,P}} = 2.9$  Hz,  $\text{P}(\text{OCH}_2\text{CH}_3)_2$ ), 26.40 (d,  $^2J_{\text{C,P}} = 1.1$  Hz,  $\text{CCH}_2\text{CH}_3$ ), 62.37 (d,  $^2J_{\text{C,P}} = 7.6$  Hz,  $\text{P}(\text{OCH}_2\text{CH}_3)_2$ ), 62.84 (d,  $^2J_{\text{C,P}} = 7.3$  Hz,  $\text{P}(\text{OCH}_2\text{CH}_3)_2$ ), 74.53 (d,  $^1J_{\text{C,P}} = 162.0$  Hz,  $\text{CP}(\text{OCH}_2\text{CH}_3)_2$ ), 82.71 (d,  $^2J_{\text{C,P}} = 12.6$  Hz,  $\text{HC}=\text{CHCH}$ ), 121.48, 153.02 (d,  $^3J_{\text{C,P}} = 2.2$  Hz), 171.83; ESI-MS: 300.6 ( $[\text{M}+\text{Na}]^+$ ); HRMS calcd for  $\text{C}_{11}\text{H}_{19}\text{O}_6\text{P}$ : 301.0811 ( $\text{M}+\text{Na}$ ) $^+$ , found: 301.0818.

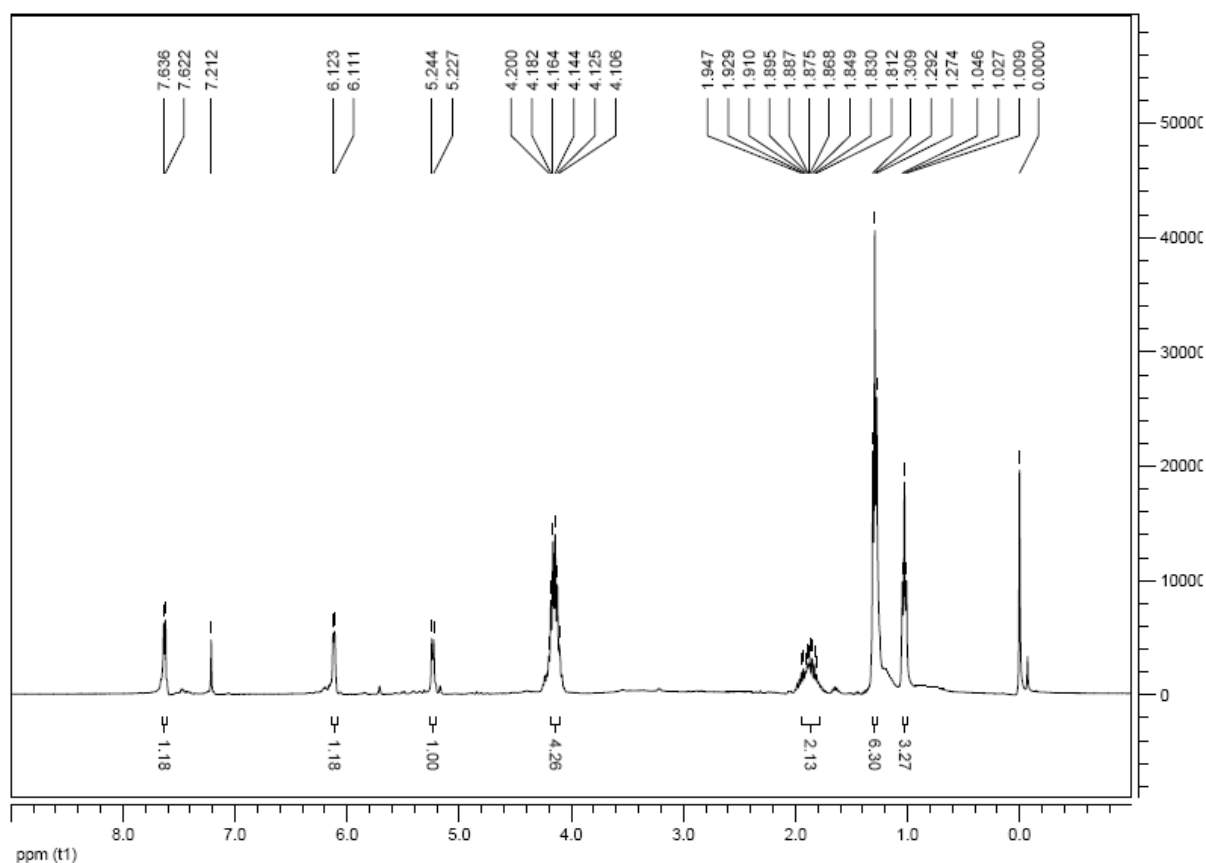

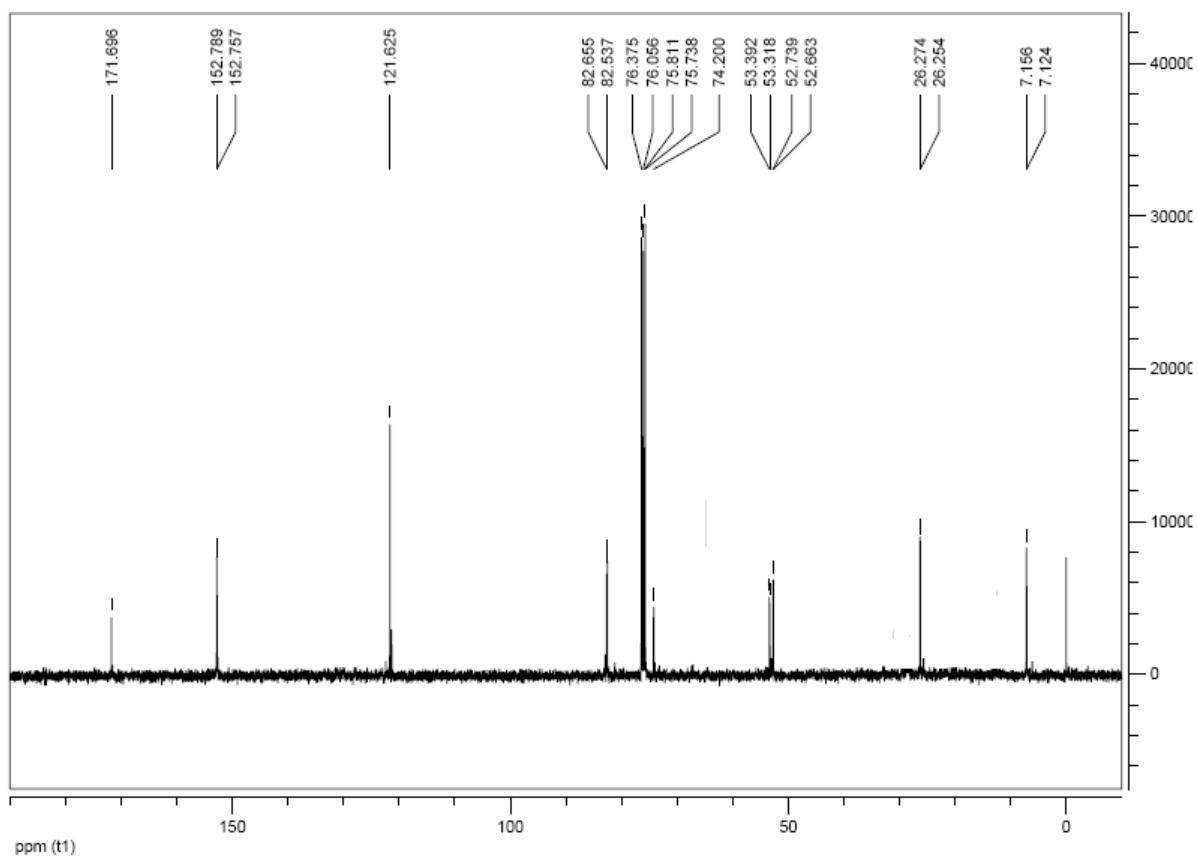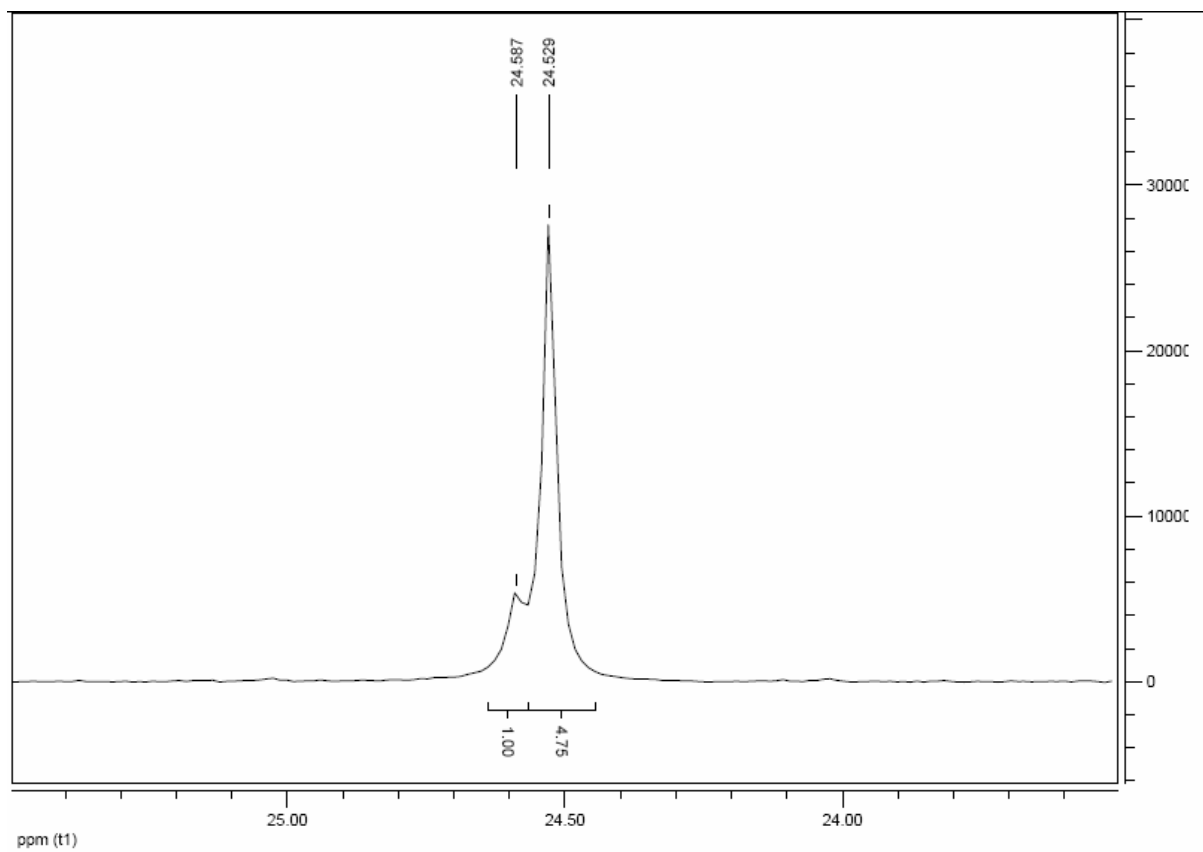

Supplement: c1ob05822c.pdf [file c1ob05822c.pdf]
